# Supplementary material for: Fe3O4–Ag2WO4: facile synthesis, characterization and visible light assisted photocatalytic activity
Source: Royal Society of Chemistry journal article supplement (doi:10.1039/c7nj03004e), 2017-01-01

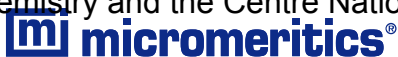

**Full Report Set**

ASAP 2020 V3.00 H

Unit 1

Serial #: 531

Page 1

Sample: SATHEESH / Silver Tungstate  
Operator: A Narayanan  
Submitter: Dr.Suganthi,Chy,Thiagarajar College,MDU  
File: C:\2020\DATA\2015\EXT-179.SMP

|                                          |                                                   |
|------------------------------------------|---------------------------------------------------|
| Started: 5/31/2015 8:59:33AM             | Analysis Adsorptive: N2                           |
| Completed: 5/31/2015 3:34:10PM           | Analysis Bath Temp.: -195.678 °C                  |
| Report Time: 5/31/2015 4:12:52PM         | Thermal Correction: No                            |
| Sample Mass: 1.5328 g                    | Warm Free Space: 15.5497 cm <sup>3</sup> Measured |
| Cold Free Space: 47.0868 cm <sup>3</sup> | Equilibration Interval: 5 s                       |
| Low Pressure Dose: None                  | Automatic Degas: Yes                              |

Comments: Sample outgassed at 200 C 12 hrs

**Summary Report**

**Surface Area**

BET Surface Area: 0.9834 m<sup>2</sup>/g

**Pore Volume**

Single point adsorption total pore volume of pores  
less than 1400.226 Å radius at P/Po = 0.993060845: 0.003760 cm<sup>3</sup>/g

**Full Report Set**

ASAP 2020 V3.00 H

Unit 1

Serial #: 531

Page 2

Sample: SATHEESH / Silver Tungstate  
 Operator: A Narayanan  
 Submitter: Dr.Suganthi,Chy,Thiagarajar College,MDU  
 File: C:\2020\DATA\2015\EXT-179.SMP

|                                          |                                                   |
|------------------------------------------|---------------------------------------------------|
| Started: 5/31/2015 8:59:33AM             | Analysis Adsorptive: N2                           |
| Completed: 5/31/2015 3:34:10PM           | Analysis Bath Temp.: -195.678 °C                  |
| Report Time: 5/31/2015 4:12:52PM         | Thermal Correction: No                            |
| Sample Mass: 1.5328 g                    | Warm Free Space: 15.5497 cm <sup>3</sup> Measured |
| Cold Free Space: 47.0868 cm <sup>3</sup> | Equilibration Interval: 5 s                       |
| Low Pressure Dose: None                  | Automatic Degas: Yes                              |

Comments: Sample outgassed at 200 C 12 hrs

**Isotherm Tabular Report**

| Relative Pressure (P/Po) | Absolute Pressure (mmHg) | Quantity Adsorbed (cm <sup>3</sup> /g STP) | Saturation Pressure (mmHg) |
|--------------------------|--------------------------|--------------------------------------------|----------------------------|
|                          |                          |                                            | 771.62628                  |
| 0.010381843              | 8.00445                  | 0.1308                                     |                            |
| 0.023599865              | 18.19496                 | 0.1582                                     |                            |
| 0.035325709              | 27.23435                 | 0.1746                                     |                            |
| 0.047006437              | 36.23896                 | 0.1873                                     |                            |
| 0.058540251              | 45.12917                 | 0.1973                                     |                            |
| 0.061242413              | 47.21060                 | 0.1997                                     |                            |
| 0.071347072              | 54.99812                 | 0.1982                                     |                            |
| 0.080778446              | 62.26609                 | 0.2101                                     |                            |
| 0.101118812              | 77.94357                 | 0.2221                                     |                            |
| 0.120728272              | 93.05544                 | 0.2330                                     |                            |
| 0.141144228              | 108.78784                | 0.2420                                     |                            |
| 0.161073669              | 124.14414                | 0.2506                                     |                            |
| 0.180800018              | 139.34282                | 0.2581                                     |                            |
| 0.200812907              | 154.76401                | 0.2654                                     |                            |
| 0.251740022              | 194.00595                | 0.2805                                     |                            |
| 0.301680374              | 232.48465                | 0.2943                                     |                            |
| 0.351605769              | 270.94907                | 0.3075                                     |                            |
| 0.401379537              | 309.29388                | 0.3203                                     |                            |
| 0.451461393              | 347.87335                | 0.3339                                     |                            |
| 0.501529492              | 386.43945                | 0.3472                                     |                            |
| 0.551848846              | 425.19638                | 0.3621                                     |                            |
| 0.601839574              | 463.68903                | 0.3790                                     |                            |
| 0.651622018              | 502.02606                | 0.3986                                     |                            |
| 0.702141659              | 540.92828                | 0.4223                                     |                            |
| 0.741536981              | 571.25787                | 0.4459                                     |                            |
| 0.771686189              | 594.47327                | 0.4651                                     |                            |
| 0.802223037              | 617.96429                | 0.4924                                     |                            |
| 0.822230183              | 633.35339                | 0.5155                                     |                            |
| 0.841974181              | 648.53870                | 0.5417                                     |                            |
| 0.862197111              | 664.09180                | 0.5720                                     |                            |
| 0.876862901              | 675.36365                | 0.5997                                     |                            |
| 0.892280050              | 687.20105                | 0.6337                                     |                            |
| 0.907071061              | 698.58002                | 0.6737                                     |                            |
| 0.917160701              | 706.31256                | 0.7100                                     |                            |
| 0.927258423              | 714.06329                | 0.7521                                     |                            |
| 0.935587604              | 720.45160                | 0.7983                                     |                            |
| 0.942547386              | 725.78497                | 0.8439                                     |                            |
| 0.949678312              | 731.23663                | 0.8980                                     |                            |
| 0.955454359              | 735.65771                | 0.9547                                     |                            |
|                          |                          |                                            | 769.92828                  |
| 0.961620848              | 740.37909                | 1.0319                                     |                            |

**Full Report Set**

ASAP 2020 V3.00 H

Unit 1

Serial #: 531

Page 3

Sample: SATHEESH / Silver Tungstate  
 Operator: A Narayanan  
 Submitter: Dr.Suganthi,Chy,Thiagarajar College,MDU  
 File: C:\2020\DATA\2015\EXT-179.SMP

|                                          |                                                   |
|------------------------------------------|---------------------------------------------------|
| Started: 5/31/2015 8:59:33AM             | Analysis Adsorptive: N2                           |
| Completed: 5/31/2015 3:34:10PM           | Analysis Bath Temp.: -195.678 °C                  |
| Report Time: 5/31/2015 4:12:52PM         | Thermal Correction: No                            |
| Sample Mass: 1.5328 g                    | Warm Free Space: 15.5497 cm <sup>3</sup> Measured |
| Cold Free Space: 47.0868 cm <sup>3</sup> | Equilibration Interval: 5 s                       |
| Low Pressure Dose: None                  | Automatic Degas: Yes                              |

Comments: Sample outgassed at 200 C 12 hrs

**Isotherm Tabular Report**

| Relative Pressure (P/Po) | Absolute Pressure (mmHg) | Quantity Adsorbed (cm <sup>3</sup> /g STP) | Saturation Pressure (mmHg) |
|--------------------------|--------------------------|--------------------------------------------|----------------------------|
| 0.964495555              | 742.59241                | 1.0844                                     |                            |
| 0.968576888              | 745.73474                | 1.1524                                     |                            |
| 0.970938138              | 747.55273                | 1.2139                                     |                            |
| 0.974693181              | 750.44385                | 1.2996                                     |                            |
| 0.977015269              | 752.23169                | 1.3807                                     |                            |
| 0.980796313              | 755.14282                | 1.5051                                     |                            |
| 0.981634634              | 755.78827                | 1.5633                                     |                            |
| 0.985025096              | 758.39868                | 1.7155                                     |                            |
| 0.993060845              | 764.58563                | 2.4305                                     |                            |
| 0.950421281              | 731.75623                | 1.0813                                     |                            |
| 0.889312185              | 684.70660                | 0.7315                                     |                            |
| 0.840744682              | 647.31311                | 0.6299                                     |                            |
| 0.796114949              | 612.95142                | 0.5796                                     |                            |
| 0.751491874              | 578.59485                | 0.5462                                     |                            |
| 0.725736840              | 558.76532                | 0.5303                                     |                            |
| 0.681166007              | 524.44897                | 0.5098                                     |                            |
| 0.636775601              | 490.27155                | 0.4931                                     |                            |
| 0.593453330              | 456.91650                | 0.4774                                     |                            |
| 0.549080364              | 422.75250                | 0.4637                                     |                            |
| 0.504833523              | 388.68561                | 0.4511                                     |                            |
| 0.460571937              | 354.60736                | 0.4384                                     |                            |
| 0.416524152              | 320.69373                | 0.4262                                     |                            |
| 0.372411997              | 286.73053                | 0.4148                                     |                            |
| 0.328241179              | 252.72217                | 0.4024                                     |                            |
| 0.283612238              | 218.36108                | 0.3890                                     |                            |
| 0.239487201              | 184.38797                | 0.3752                                     |                            |
| 0.195268621              | 150.34283                | 0.3599                                     |                            |
| 0.150761336              | 116.07542                | 0.3402                                     |                            |
| 0.106713363              | 82.16164                 | 0.3217                                     |                            |
| 0.062479632              | 48.10484                 | 0.2917                                     |                            |

Sample: SATHEESH / Silver Tungstate  
Operator: A Narayanan  
Submitter: Dr.Suganthi,Chy,Thiagarajar College,MDU  
File: C:\2020\DATA\2015\EXT-179.SMP

Started: 5/31/2015 8:59:33AM  
Completed: 5/31/2015 3:34:10PM  
Report Time: 5/31/2015 4:12:52PM  
Sample Mass: 1.5328 g  
Cold Free Space: 47.0868 cm<sup>3</sup>  
Low Pressure Dose: None

Analysis Adsorptive: N2  
Analysis Bath Temp.: -195.678 °C  
Thermal Correction: No  
Warm Free Space: 15.5497 cm<sup>3</sup> Measured  
Equilibration Interval: 5 s  
Automatic Degas: Yes

Comments: Sample outgassed at 200 C 12 hrs

**Isotherm Linear Plot**

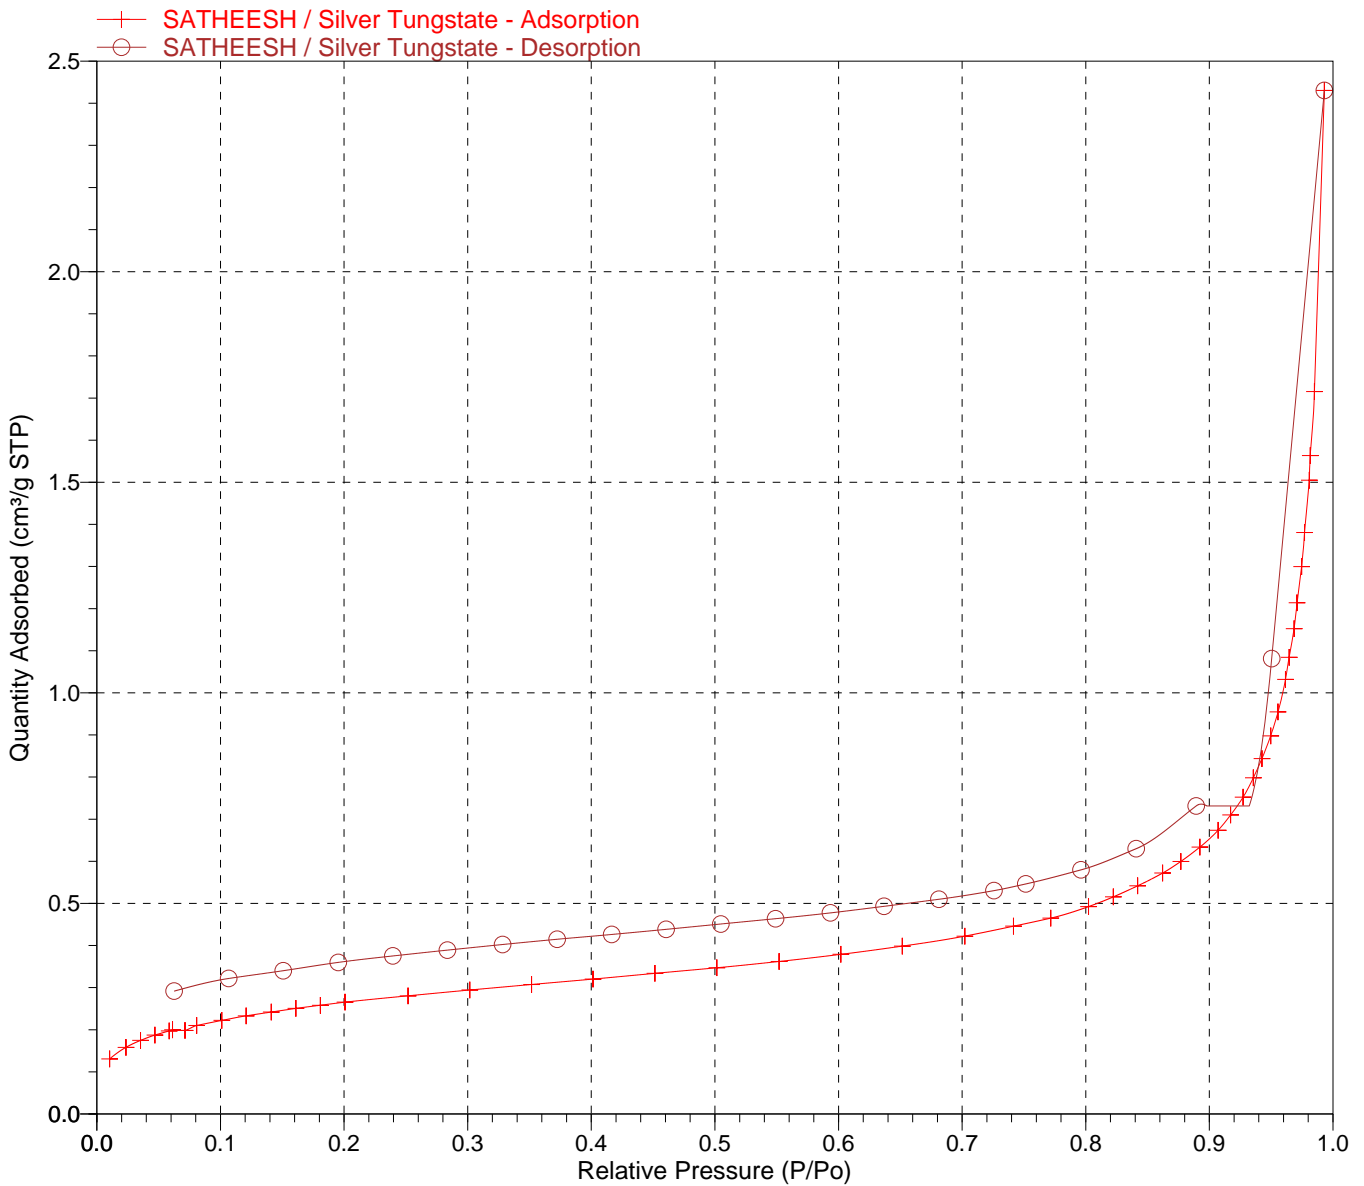

**Full Report Set**

ASAP 2020 V3.00 H

Unit 1

Serial #: 531

Page 5

Sample: SATHEESH / Silver Tungstate  
 Operator: A Narayanan  
 Submitter: Dr.Suganthi,Chy,Thiagarajar College,MDU  
 File: C:\2020\DATA\2015\EXT-179.SMP

|                                          |                                                   |
|------------------------------------------|---------------------------------------------------|
| Started: 5/31/2015 8:59:33AM             | Analysis Adsorptive: N2                           |
| Completed: 5/31/2015 3:34:10PM           | Analysis Bath Temp.: -195.678 °C                  |
| Report Time: 5/31/2015 4:12:52PM         | Thermal Correction: No                            |
| Sample Mass: 1.5328 g                    | Warm Free Space: 15.5497 cm <sup>3</sup> Measured |
| Cold Free Space: 47.0868 cm <sup>3</sup> | Equilibration Interval: 5 s                       |
| Low Pressure Dose: None                  | Automatic Degas: Yes                              |

Comments: Sample outgassed at 200 C 12 hrs

**BET Surface Area Report**

BET Surface Area: 0.9834 ± 0.0094 m<sup>2</sup>/g  
 Slope: 4.362134 ± 0.042059 g/cm<sup>3</sup> STP  
 Y-Intercept: 0.064772 ± 0.004900 g/cm<sup>3</sup> STP  
 C: 68.346156  
 Qm: 0.2259 cm<sup>3</sup>/g STP  
 Correlation Coefficient: 0.9996748  
 Molecular Cross-Sectional Area: 0.1620 nm<sup>2</sup>

| Relative Pressure (P/Po) | Quantity Adsorbed (cm <sup>3</sup> /g STP) | 1/[Q(Po/P - 1)] |
|--------------------------|--------------------------------------------|-----------------|
| 0.058540251              | 0.1973                                     | 0.315133        |
| 0.061242413              | 0.1997                                     | 0.326685        |
| 0.071347072              | 0.1982                                     | 0.387644        |
| 0.080778446              | 0.2101                                     | 0.418336        |
| 0.101118812              | 0.2221                                     | 0.506444        |
| 0.120728272              | 0.2330                                     | 0.589282        |
| 0.141144228              | 0.2420                                     | 0.679172        |
| 0.161073669              | 0.2506                                     | 0.766122        |
| 0.180800018              | 0.2581                                     | 0.854942        |

Sample: SATHEESH / Silver Tungstate  
Operator: A Narayanan  
Submitter: Dr.Suganthi,Chy,Thiagarajar College,MDU  
File: C:\2020\DATA\2015\EXT-179.SMP

Started: 5/31/2015 8:59:33AM  
Completed: 5/31/2015 3:34:10PM  
Report Time: 5/31/2015 4:12:52PM  
Sample Mass: 1.5328 g  
Cold Free Space: 47.0868 cm<sup>3</sup>  
Low Pressure Dose: None

Analysis Adsorptive: N2  
Analysis Bath Temp.: -195.678 °C  
Thermal Correction: No  
Warm Free Space: 15.5497 cm<sup>3</sup> Measured  
Equilibration Interval: 5 s  
Automatic Degas: Yes

Comments: Sample outgassed at 200 C 12 hrs

**BET Surface Area Plot**

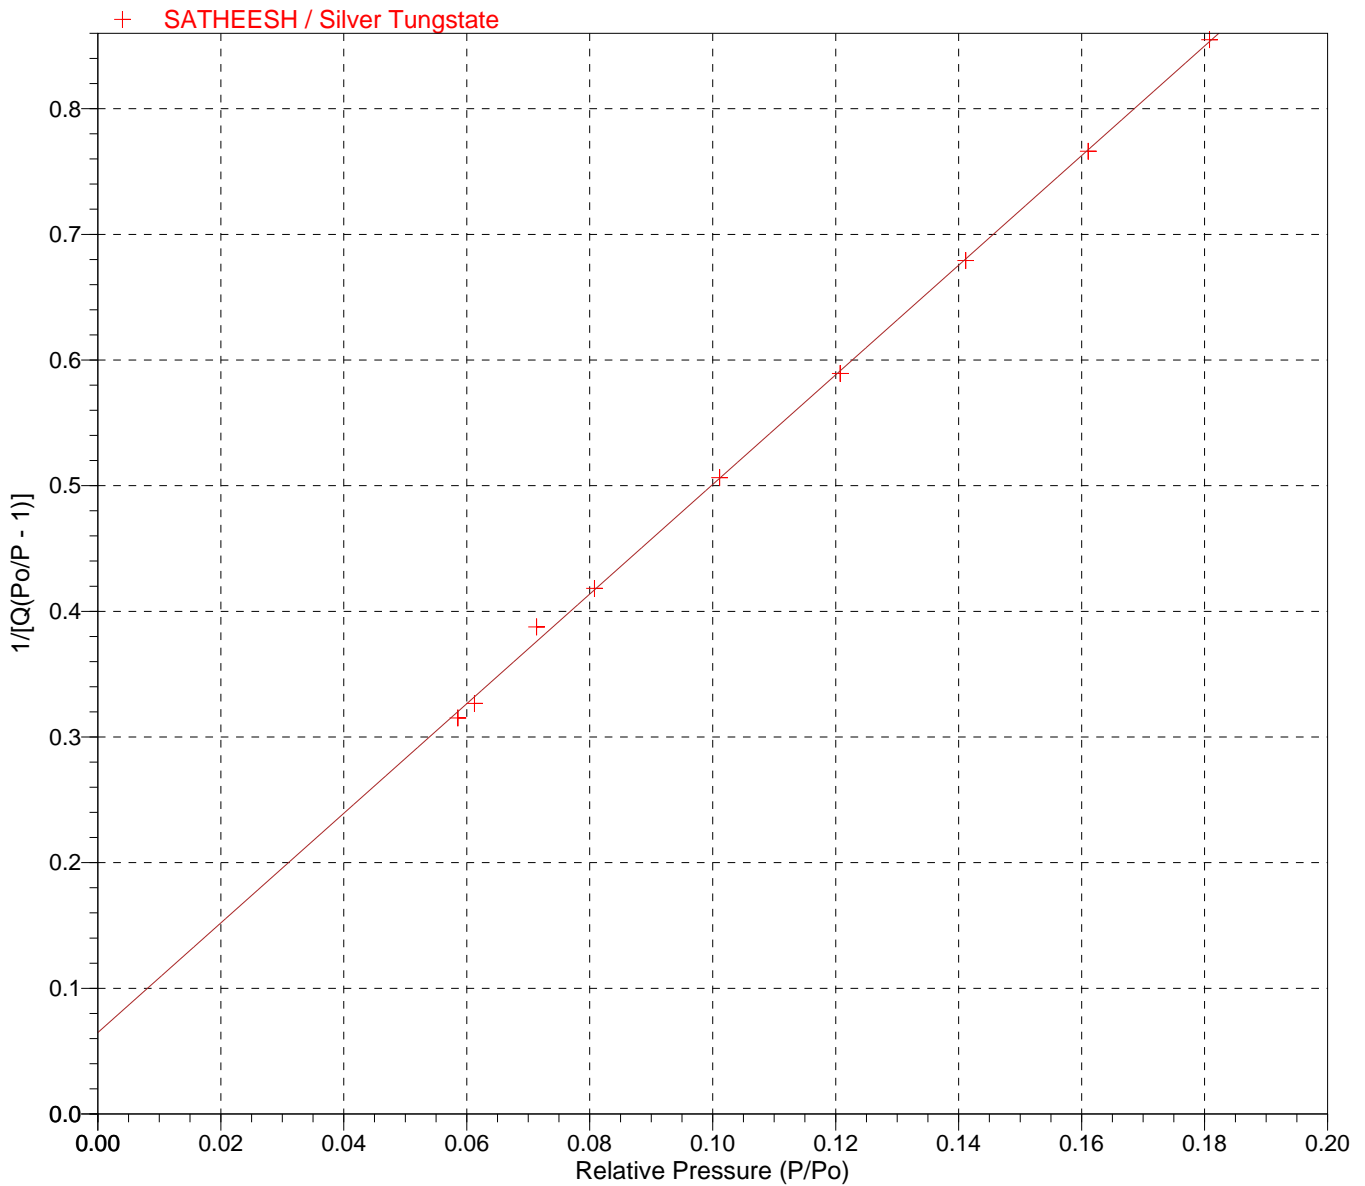

Supplement: c7nj03004e1.pdf [file c7nj03004e1.pdf]
