# Supplementary material for: Fe3O4–Ag2WO4: facile synthesis, characterization and visible light assisted photocatalytic activity
Source: Royal Society of Chemistry journal article supplement (doi:10.1039/c7nj03004e), 2017-01-01

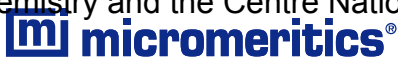

### Full Report Set

ASAP 2020 V3.00 H

Unit 1

Serial #: 531

Page 1

Sample: Satheesh / Iron Oxide Ag Tungstate  
Operator: A Narayanan  
Submitter: Chemistry, Thiagarajar College, Madurai  
File: C:\2020\DATA\2013\EXT-188.SMP

|                                          |                                                   |
|------------------------------------------|---------------------------------------------------|
| Started: 7/26/2013 8:19:53AM             | Analysis Adsorptive: N2                           |
| Completed: 7/26/2013 9:42:09PM           | Analysis Bath Temp.: -195.667 °C                  |
| Report Time: 11/10/2014 4:09:03PM        | Thermal Correction: No                            |
| Sample Mass: 0.7873 g                    | Warm Free Space: 16.6299 cm <sup>3</sup> Measured |
| Cold Free Space: 50.9896 cm <sup>3</sup> | Equilibration Interval: 5 s                       |
| Low Pressure Dose: None                  | Automatic Degas: Yes                              |

Comments: Sample outgassed at 200 C 12 hrs.

### Summary Report

#### Surface Area

BET Surface Area: 40.0243 m<sup>2</sup>/g

#### Pore Volume

Single point adsorption total pore volume of pores  
less than 742.696 Å radius at P/Po = 0.986799915: 0.276351 cm<sup>3</sup>/g

#### Pore Size

BJH Desorption average pore radius (2V/A): 108.508 Å

**Full Report Set**

ASAP 2020 V3.00 H

Unit 1

Serial #: 531

Page 2

Sample: Satheesh / Iron Oxide Ag Tungstate  
 Operator: A Narayanan  
 Submitter: Chemistry,Thiagarajar College, Madurai  
 File: C:\2020\DATA\2013\EXT-188.SMP

|                                          |                                                   |
|------------------------------------------|---------------------------------------------------|
| Started: 7/26/2013 8:19:53AM             | Analysis Adsorptive: N2                           |
| Completed: 7/26/2013 9:42:09PM           | Analysis Bath Temp.: -195.667 °C                  |
| Report Time: 11/10/2014 4:09:03PM        | Thermal Correction: No                            |
| Sample Mass: 0.7873 g                    | Warm Free Space: 16.6299 cm <sup>3</sup> Measured |
| Cold Free Space: 50.9896 cm <sup>3</sup> | Equilibration Interval: 5 s                       |
| Low Pressure Dose: None                  | Automatic Degas: Yes                              |

Comments: Sample outgassed at 200 C 12 hrs.

**Isotherm Tabular Report**

| Relative Pressure (P/Po) | Absolute Pressure (mmHg) | Quantity Adsorbed (cm <sup>3</sup> /g STP) | Saturation Pressure (mmHg) |
|--------------------------|--------------------------|--------------------------------------------|----------------------------|
|                          |                          |                                            | 773.37610                  |
| 0.009938261              | 7.67881                  | 6.5566                                     |                            |
| 0.022525754              | 17.40257                 | 7.3985                                     |                            |
| 0.032409452              | 25.03673                 | 7.8199                                     |                            |
| 0.039710585              | 30.67596                 | 8.0759                                     |                            |
| 0.050527210              | 39.02978                 | 8.4053                                     |                            |
| 0.060226114              | 46.51945                 | 8.6664                                     |                            |
| 0.070747029              | 54.64329                 | 8.9253                                     |                            |
| 0.081237957              | 62.74419                 | 9.1632                                     |                            |
| 0.100933831              | 77.95253                 | 9.5777                                     |                            |
| 0.120831256              | 93.31504                 | 9.9663                                     |                            |
| 0.140788955              | 108.72437                | 10.3352                                    |                            |
| 0.160708342              | 124.10110                | 10.6894                                    |                            |
| 0.181178403              | 139.90155                | 11.0422                                    |                            |
| 0.201182586              | 155.34326                | 11.3812                                    |                            |
| 0.249320937              | 192.50397                | 12.1709                                    |                            |
| 0.302734887              | 233.73422                | 13.0319                                    |                            |
| 0.354288160              | 273.52396                | 13.8606                                    |                            |
| 0.401518010              | 309.97214                | 14.6371                                    |                            |
| 0.451351074              | 348.42072                | 15.4841                                    |                            |
| 0.501542561              | 387.14725                | 16.3864                                    |                            |
| 0.551588766              | 425.75787                | 17.3727                                    |                            |
|                          |                          |                                            | 771.85052                  |
| 0.601666241              | 464.37173                | 18.4818                                    |                            |
| 0.650136180              | 501.75464                | 19.7362                                    |                            |
| 0.700304447              | 540.44421                | 21.3176                                    |                            |
| 0.740113750              | 571.13580                | 22.9294                                    |                            |
| 0.771191255              | 595.07837                | 24.5080                                    |                            |
| 0.800168729              | 617.39740                | 26.3823                                    |                            |
| 0.820809516              | 633.28143                | 28.1048                                    |                            |
| 0.840703058              | 648.57825                | 30.2250                                    |                            |
| 0.859909831              | 663.34283                | 32.9202                                    |                            |
| 0.875382459              | 675.21576                | 35.8790                                    |                            |
| 0.890198127              | 686.57977                | 39.7601                                    |                            |
| 0.902339007              | 695.86963                | 44.6204                                    |                            |
| 0.911921944              | 703.18506                | 49.7197                                    |                            |
| 0.919890916              | 709.25452                | 55.2291                                    |                            |
| 0.930154621              | 717.02502                | 64.9364                                    |                            |
| 0.935376668              | 720.96423                | 71.3871                                    |                            |
| 0.943978495              | 727.44916                | 84.5494                                    |                            |
|                          |                          |                                            | 770.59998                  |
| 0.948344146              | 730.77094                | 92.1763                                    |                            |

**Full Report Set**

ASAP 2020 V3.00 H

Unit 1

Serial #: 531

Page 3

Sample: Satheesh / Iron Oxide Ag Tungstate  
 Operator: A Narayanan  
 Submitter: Chemistry,Thiagarajar College, Madurai  
 File: C:\2020\DATA\2013\EXT-188.SMP

Started: 7/26/2013 8:19:53AM      Analysis Adsorptive: N2  
 Completed: 7/26/2013 9:42:09PM      Analysis Bath Temp.: -195.667 °C  
 Report Time: 11/10/2014 4:09:03PM      Thermal Correction: No  
 Sample Mass: 0.7873 g      Warm Free Space: 16.6299 cm<sup>3</sup> Measured  
 Cold Free Space: 50.9896 cm<sup>3</sup>      Equilibration Interval: 5 s  
 Low Pressure Dose: None      Automatic Degas: Yes

Comments: Sample outgassed at 200 C 12 hrs.

**Isotherm Tabular Report**

| Relative Pressure (P/Po) | Absolute Pressure (mmHg) | Quantity Adsorbed (cm <sup>3</sup> /g STP) | Saturation Pressure (mmHg) |
|--------------------------|--------------------------|--------------------------------------------|----------------------------|
| 0.955035755              | 735.88092                | 105.1804                                   |                            |
| 0.958773434              | 738.73761                | 112.4762                                   |                            |
| 0.964211098              | 742.88049                | 124.9199                                   |                            |
| 0.966750629              | 744.81360                | 131.7502                                   |                            |
| 0.969742695              | 747.09521                | 138.6004                                   |                            |
| 0.971998057              | 748.81177                | 143.8874                                   |                            |
| 0.975079986              | 751.14392                | 151.9592                                   |                            |
| 0.976686036              | 752.36267                | 155.8468                                   |                            |
| 0.978453250              | 753.70551                | 159.8046                                   |                            |
| 0.980013452              | 754.88617                | 163.8808                                   |                            |
|                          |                          |                                            | 770.25714                  |
| 0.983413822              | 757.54822                | 171.9880                                   |                            |
| 0.985334673              | 759.09473                | 175.3964                                   |                            |
| 0.986799915              | 760.29047                | 178.6600                                   |                            |
| 0.956294612              | 736.96338                | 163.3872                                   |                            |
| 0.951110661              | 733.07898                | 157.5393                                   |                            |
| 0.937507042              | 722.77551                | 137.6347                                   |                            |
| 0.926755840              | 714.63049                | 120.3934                                   |                            |
| 0.916151257              | 706.61298                | 103.1731                                   |                            |
| 0.905033993              | 698.23132                | 86.6629                                    |                            |
|                          |                          |                                            | 771.51672                  |
| 0.893287683              | 689.35974                | 70.5724                                    |                            |
| 0.874059547              | 674.76501                | 53.2640                                    |                            |
| 0.862681810              | 666.16986                | 45.9817                                    |                            |
| 0.810901506              | 626.39124                | 30.5447                                    |                            |
| 0.764725283              | 590.81458                | 25.7795                                    |                            |
| 0.725121571              | 560.26135                | 23.4123                                    |                            |
| 0.668807271              | 516.80719                | 21.1485                                    |                            |
| 0.641510315              | 495.73737                | 20.2901                                    |                            |
| 0.593212975              | 458.44360                | 19.0078                                    |                            |
| 0.548149238              | 423.64429                | 17.9720                                    |                            |
| 0.503859170              | 389.43246                | 17.0745                                    |                            |
| 0.460284079              | 355.77005                | 16.2119                                    |                            |
| 0.415392181              | 321.08661                | 15.3628                                    |                            |
|                          |                          |                                            | 772.99646                  |
| 0.370564133              | 286.44476                | 14.6144                                    |                            |
| 0.328280039              | 253.75931                | 13.9278                                    |                            |
| 0.283580840              | 219.20699                | 13.2079                                    |                            |
| 0.239486745              | 185.12241                | 12.4941                                    |                            |
| 0.195571413              | 151.17601                | 11.7681                                    |                            |
| 0.151100742              | 116.80034                | 11.0071                                    |                            |

Sample: Satheesh / Iron Oxide Ag Tungstate  
Operator: A Narayanan  
Submitter: Chemistry, Thiagarajar College, Madurai  
File: C:\2020\DATA\2013\EXT-188.SMP

Started: 7/26/2013 8:19:53AM  
Completed: 7/26/2013 9:42:09PM  
Report Time: 11/10/2014 4:09:03PM  
Sample Mass: 0.7873 g  
Cold Free Space: 50.9896 cm<sup>3</sup>  
Low Pressure Dose: None

Analysis Adsorptive: N2  
Analysis Bath Temp.: -195.667 °C  
Thermal Correction: No  
Warm Free Space: 16.6299 cm<sup>3</sup> Measured  
Equilibration Interval: 5 s  
Automatic Degas: Yes

Comments: Sample outgassed at 200 C 12 hrs.

**Isotherm Linear Plot**

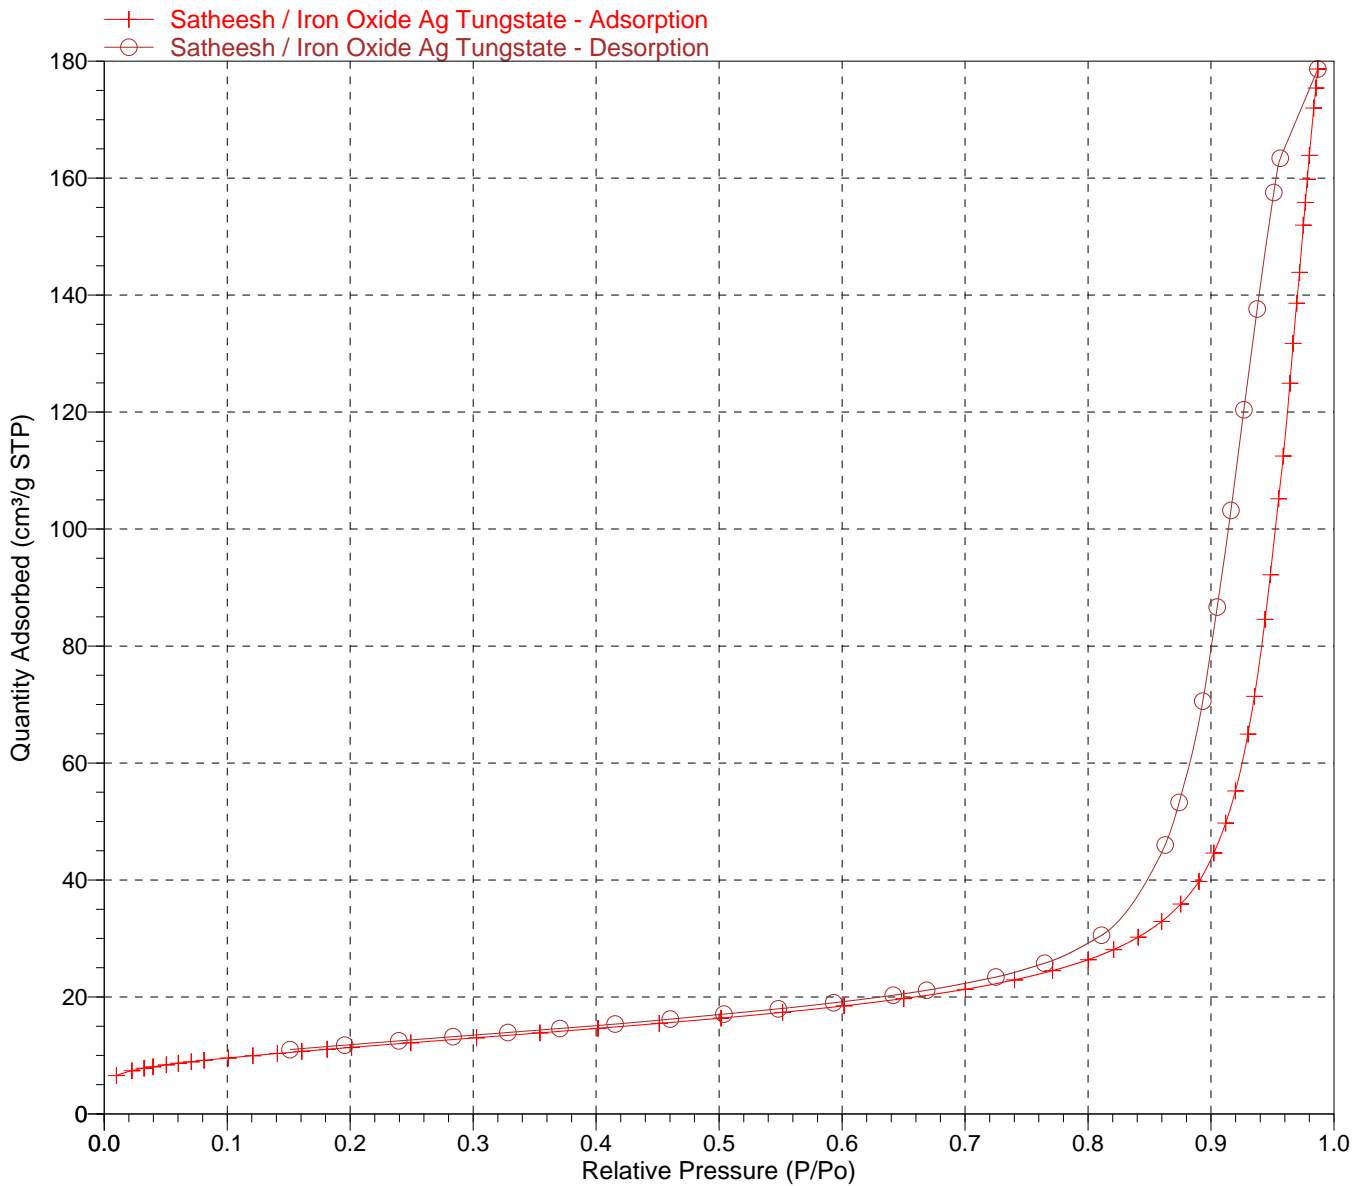

**Full Report Set**

ASAP 2020 V3.00 H

Unit 1

Serial #: 531

Page 5

Sample: Satheesh / Iron Oxide Ag Tungstate  
 Operator: A Narayanan  
 Submitter: Chemistry,Thiagarajar College,Madurai  
 File: C:\2020\DATA\2013\EXT-188.SMP

|                                          |                                                   |
|------------------------------------------|---------------------------------------------------|
| Started: 7/26/2013 8:19:53AM             | Analysis Adsorptive: N2                           |
| Completed: 7/26/2013 9:42:09PM           | Analysis Bath Temp.: -195.667 °C                  |
| Report Time: 11/10/2014 4:09:03PM        | Thermal Correction: No                            |
| Sample Mass: 0.7873 g                    | Warm Free Space: 16.6299 cm <sup>3</sup> Measured |
| Cold Free Space: 50.9896 cm <sup>3</sup> | Equilibration Interval: 5 s                       |
| Low Pressure Dose: None                  | Automatic Degas: Yes                              |

Comments: Sample outgassed at 200 C 12 hrs.

**BET Surface Area Report**

BET Surface Area: 40.0243 ± 0.2248 m<sup>2</sup>/g  
 Slope: 0.108051 ± 0.000603 g/cm<sup>3</sup> STP  
 Y-Intercept: 0.000713 ± 0.000097 g/cm<sup>3</sup> STP  
 C: 152.595341  
 Qm: 9.1942 cm<sup>3</sup>/g STP  
 Correlation Coefficient: 0.9997664  
 Molecular Cross-Sectional Area: 0.1620 nm<sup>2</sup>

| Relative Pressure (P/Po) | Quantity Adsorbed (cm <sup>3</sup> /g STP) | 1/[Q(Po/P - 1)] |
|--------------------------|--------------------------------------------|-----------------|
| 0.009938261              | 6.5566                                     | 0.001531        |
| 0.022525754              | 7.3985                                     | 0.003115        |
| 0.032409452              | 7.8199                                     | 0.004283        |
| 0.039710585              | 8.0759                                     | 0.005121        |
| 0.050527210              | 8.4053                                     | 0.006331        |
| 0.060226114              | 8.6664                                     | 0.007395        |
| 0.070747029              | 8.9253                                     | 0.008530        |
| 0.081237957              | 9.1632                                     | 0.009650        |
| 0.100933831              | 9.5777                                     | 0.011722        |
| 0.120831256              | 9.9663                                     | 0.013790        |
| 0.140788955              | 10.3352                                    | 0.015854        |
| 0.160708342              | 10.6894                                    | 0.017913        |
| 0.181178403              | 11.0422                                    | 0.020038        |
| 0.201182586              | 11.3812                                    | 0.022129        |
| 0.249320937              | 12.1709                                    | 0.027289        |
| 0.302734887              | 13.0319                                    | 0.033316        |
| 0.354288160              | 13.8606                                    | 0.039585        |

Sample: Satheesh / Iron Oxide Ag Tungstate  
Operator: A Narayanan  
Submitter: Chemistry, Thiagarajar College, Madurai  
File: C:\2020\DATA\2013\EXT-188.SMP

Started: 7/26/2013 8:19:53AM  
Completed: 7/26/2013 9:42:09PM  
Report Time: 11/10/2014 4:09:03PM  
Sample Mass: 0.7873 g  
Cold Free Space: 50.9896 cm<sup>3</sup>  
Low Pressure Dose: None

Analysis Adsorptive: N2  
Analysis Bath Temp.: -195.667 °C  
Thermal Correction: No  
Warm Free Space: 16.6299 cm<sup>3</sup> Measured  
Equilibration Interval: 5 s  
Automatic Degas: Yes

Comments: Sample outgassed at 200 C 12 hrs.

**BET Surface Area Plot**

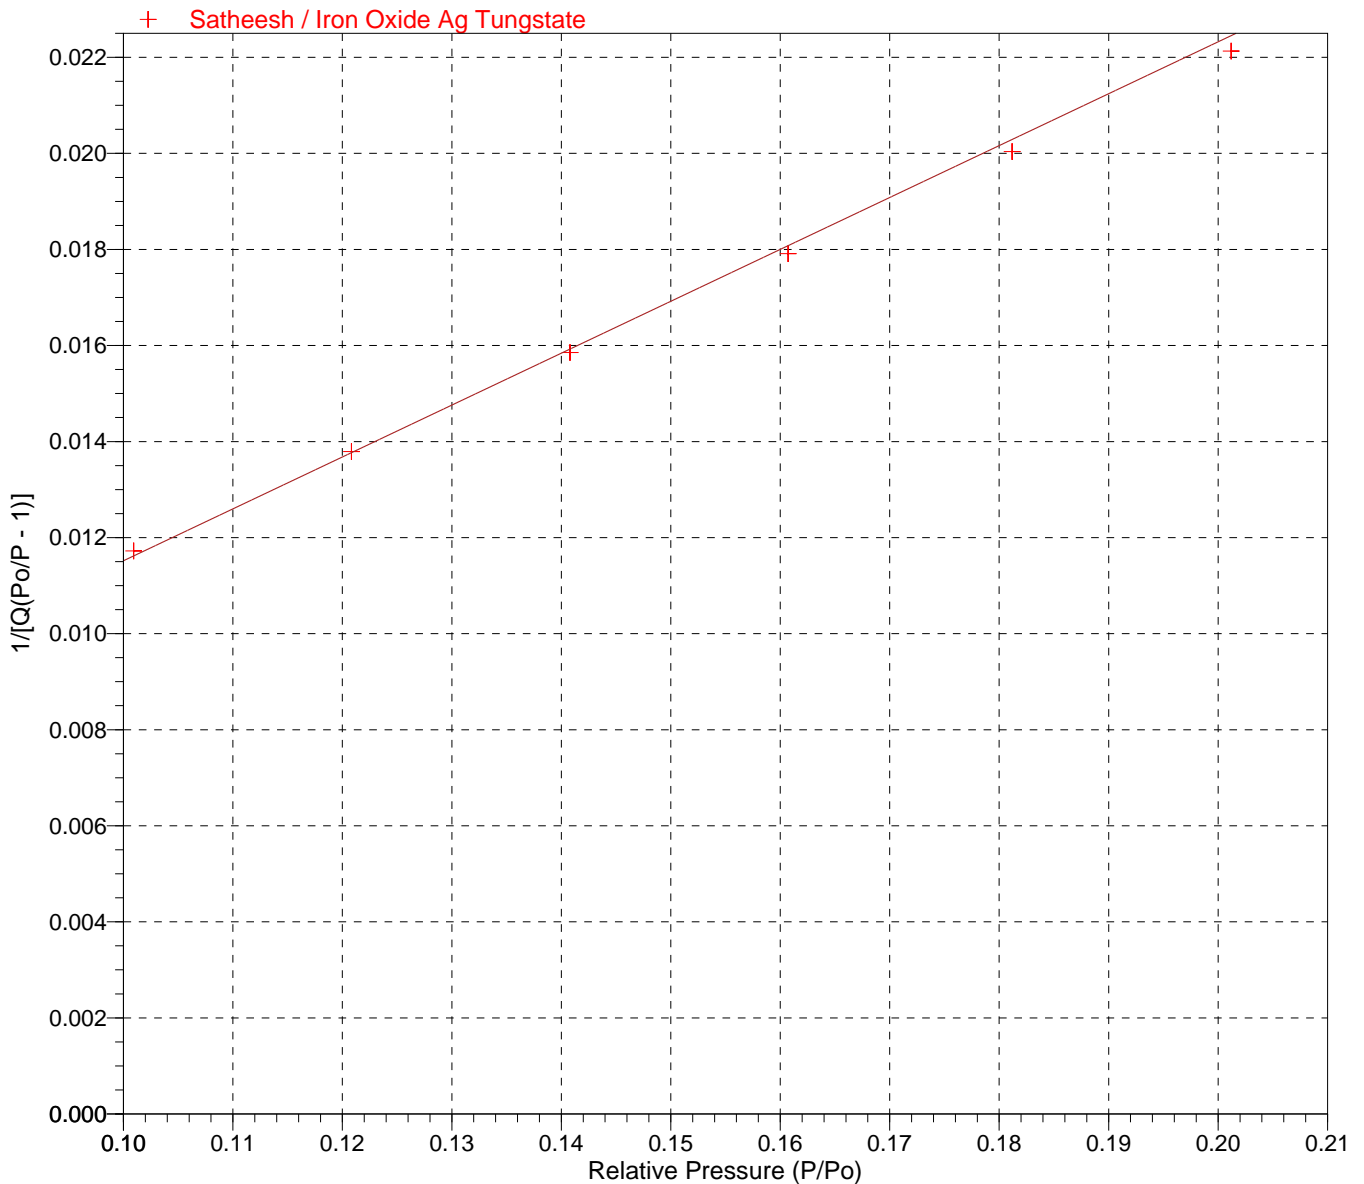

**Full Report Set**

ASAP 2020 V3.00 H

Unit 1

Serial #: 531

Page 7

Sample: Satheesh / Iron Oxide Ag Tungstate  
 Operator: A Narayanan  
 Submitter: Chemistry,Thiagarajar College, Madurai  
 File: C:\2020\DATA\2013\EXT-188.SMP

|                                          |                                                   |
|------------------------------------------|---------------------------------------------------|
| Started: 7/26/2013 8:19:53AM             | Analysis Adsorptive: N2                           |
| Completed: 7/26/2013 9:42:09PM           | Analysis Bath Temp.: -195.667 °C                  |
| Report Time: 11/10/2014 4:09:03PM        | Thermal Correction: No                            |
| Sample Mass: 0.7873 g                    | Warm Free Space: 16.6299 cm <sup>3</sup> Measured |
| Cold Free Space: 50.9896 cm <sup>3</sup> | Equilibration Interval: 5 s                       |
| Low Pressure Dose: None                  | Automatic Degas: Yes                              |

Comments: Sample outgassed at 200 C 12 hrs.

**BJH Desorption Pore Distribution Report**

Faas Correction

$$t = 3.54 [ -5 / \ln(P/P_0) ] ^{0.333}$$

Radius Range: 8.500 Å to 1500.000 Å

Adsorbate Property Factor: 9.53000 Å

Density Conversion Factor: 0.0015468

Fraction of Pores Open at Both Ends: 0.00

| Pore Radius Range (Å) | Average Radius (Å) | Incremental Pore Volume (cm <sup>3</sup> /g) | Cumulative Pore Volume (cm <sup>3</sup> /g) | Incremental Pore Area (m <sup>2</sup> /g) | Cumulative Pore Area (m <sup>2</sup> /g) |
|-----------------------|--------------------|----------------------------------------------|---------------------------------------------|-------------------------------------------|------------------------------------------|
| 741.2 - 228.8         | 270.8              | 0.026592                                     | 0.026592                                    | 1.964                                     | 1.964                                    |
| 228.8 - 205.0         | 215.6              | 0.010304                                     | 0.036896                                    | 0.956                                     | 2.920                                    |
| 205.0 - 161.3         | 177.8              | 0.035671                                     | 0.072567                                    | 4.013                                     | 6.933                                    |
| 161.3 - 138.1         | 147.8              | 0.031338                                     | 0.103905                                    | 4.241                                     | 11.174                                   |
| 138.1 - 121.0         | 128.3              | 0.031663                                     | 0.135569                                    | 4.935                                     | 16.109                                   |
| 121.0 - 107.1         | 113.1              | 0.030611                                     | 0.166180                                    | 5.412                                     | 21.521                                   |
| 107.1 - 95.5          | 100.6              | 0.030093                                     | 0.196273                                    | 5.984                                     | 27.505                                   |
| 95.5 - 81.1           | 87.1               | 0.032139                                     | 0.228411                                    | 7.383                                     | 34.888                                   |
| 81.1 - 74.5           | 77.5               | 0.013323                                     | 0.241734                                    | 3.438                                     | 38.327                                   |
| 74.5 - 54.2           | 60.9               | 0.026475                                     | 0.268209                                    | 8.688                                     | 47.015                                   |
| 54.2 - 43.4           | 47.5               | 0.005636                                     | 0.273845                                    | 2.372                                     | 49.387                                   |
| 43.4 - 37.0           | 39.7               | 0.001774                                     | 0.275619                                    | 0.895                                     | 50.282                                   |
| 37.0 - 30.4           | 33.0               | 0.000872                                     | 0.276491                                    | 0.529                                     | 50.810                                   |
| 30.4 - 27.9           | 29.0               | 0.000137                                     | 0.276628                                    | 0.094                                     | 50.904                                   |
| 27.9 - 24.3           | 25.8               | 0.000014                                     | 0.276641                                    | 0.011                                     | 50.915                                   |
| 24.3 - 17.4           | 18.2               | 0.000011                                     | 0.276652                                    | 0.012                                     | 50.927                                   |
| 17.4 - 15.7           | 16.5               | 0.000063                                     | 0.276715                                    | 0.077                                     | 51.004                                   |

Sample: Satheesh / Iron Oxide Ag Tungstate  
Operator: A Narayanan  
Submitter: Chemistry, Thiagarajar College, Madurai  
File: C:\2020\DATA\2013\EXT-188.SMP

Started: 7/26/2013 8:19:53AM  
Completed: 7/26/2013 9:42:09PM  
Report Time: 11/10/2014 4:09:03PM  
Sample Mass: 0.7873 g  
Cold Free Space: 50.9896 cm<sup>3</sup>  
Low Pressure Dose: None

Analysis Adsorptive: N<sub>2</sub>  
Analysis Bath Temp.: -195.667 °C  
Thermal Correction: No  
Warm Free Space: 16.6299 cm<sup>3</sup> Measured  
Equilibration Interval: 5 s  
Automatic Degas: Yes

Comments: Sample outgassed at 200 C 12 hrs.

**BJH Desorption dV/dlog(r) Pore Volume**

Faas Correction

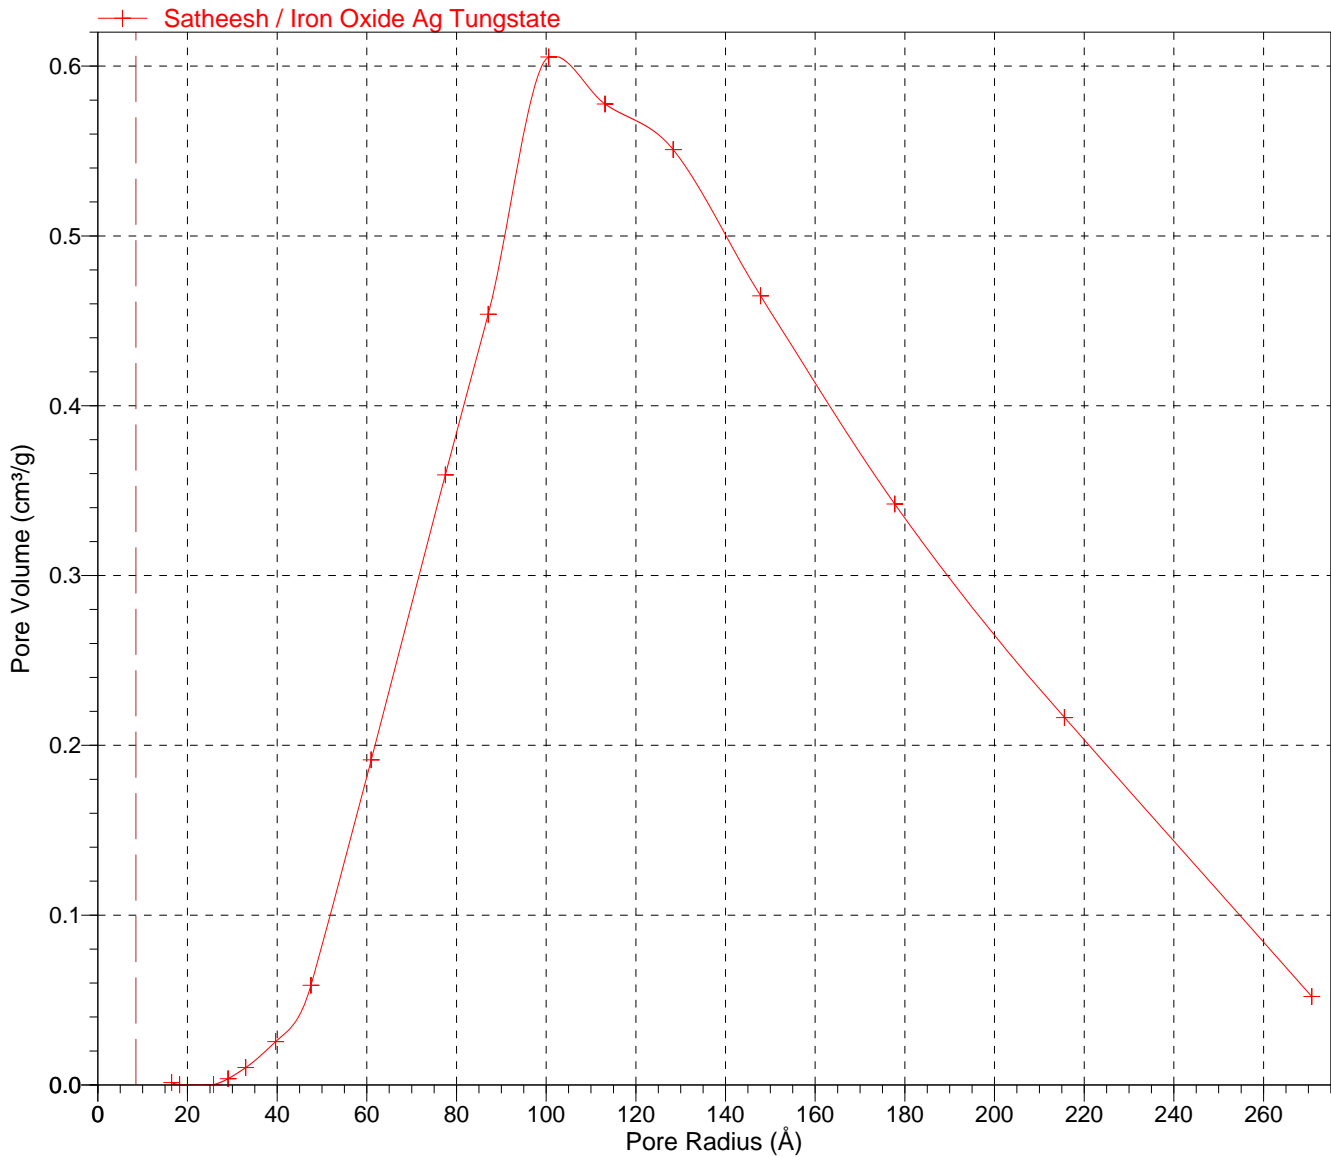



**Full Report Set**

ASAP 2020 V3.00 H

Unit 1

Serial #: 531

Page 9

Sample: Satheesh / Iron Oxide Ag Tungstate  
 Operator: A Narayanan  
 Submitter: Chemistry,Thiagarajar College, Madurai  
 File: C:\2020\DATA\2013\EXT-188.SMP

|                                          |                                                   |
|------------------------------------------|---------------------------------------------------|
| Started: 7/26/2013 8:19:53AM             | Analysis Adsorptive: N2                           |
| Completed: 7/26/2013 9:42:09PM           | Analysis Bath Temp.: -195.667 °C                  |
| Report Time: 11/10/2014 4:09:03PM        | Thermal Correction: No                            |
| Sample Mass: 0.7873 g                    | Warm Free Space: 16.6299 cm <sup>3</sup> Measured |
| Cold Free Space: 50.9896 cm <sup>3</sup> | Equilibration Interval: 5 s                       |
| Low Pressure Dose: None                  | Automatic Degas: Yes                              |

Comments: Sample outgassed at 200 C 12 hrs.

**Horvath-Kawazoe Report**

Slit Pore Geometry (Original H-K)

Maximum Pore Volume: 0.276351 cm<sup>3</sup>/g  
 at Relative Pressure: 0.986799915  
 Median Pore Width: 572.307 Å  
 Relative Pressure Range: 9.938e-03 to 9.868e-01

Diameter of Adsorptive Molecule: 3.000 Å  
 Diameter of Adsorptive at Zero Interaction Energy: 2.574 Å  
 Diameter of Sample Atom: 3.400 Å  
 Diameter of Sample Atom at Zero Interaction Energy: 2.917 Å  
 Interaction Parameter: 3.73e-43 erg-cm<sup>4</sup>

Density Conversion Factor: 0.0015468

| Absolute Pressure (mmHg) | Relative Pressure (P/Po) | Quantity Adsorbed (cm <sup>3</sup> /g STP) | Pore Width (Å) | Cumulative Pore Volume (cm <sup>3</sup> /g) | Differential Pore Volume (cm <sup>3</sup> /g-Å) |
|--------------------------|--------------------------|--------------------------------------------|----------------|---------------------------------------------|-------------------------------------------------|
| 7.67881                  | 0.009938261              | 6.5566                                     | 9.384          | 0.0101                                      | 0.0011                                          |
| 17.40257                 | 0.022525754              | 7.3985                                     | 10.885         | 0.0114                                      | 0.0009                                          |
| 25.03673                 | 0.032409452              | 7.8199                                     | 11.771         | 0.0121                                      | 0.0007                                          |
| 30.67596                 | 0.039710585              | 8.0759                                     | 12.353         | 0.0125                                      | 0.0007                                          |
| 39.02978                 | 0.050527210              | 8.4053                                     | 13.141         | 0.0130                                      | 0.0006                                          |
| 46.51945                 | 0.060226114              | 8.6664                                     | 13.799         | 0.0134                                      | 0.0006                                          |
| 54.64329                 | 0.070747029              | 8.9253                                     | 14.470         | 0.0138                                      | 0.0006                                          |
| 62.74419                 | 0.081237957              | 9.1632                                     | 15.128         | 0.0142                                      | 0.0006                                          |
| 77.95253                 | 0.100933831              | 9.5777                                     | 16.295         | 0.0148                                      | 0.0005                                          |
| 93.31504                 | 0.120831256              | 9.9663                                     | 17.457         | 0.0154                                      | 0.0005                                          |
| 108.72437                | 0.140788955              | 10.3352                                    | 18.604         | 0.0160                                      | 0.0005                                          |
| 124.10110                | 0.160708342              | 10.6894                                    | 19.748         | 0.0165                                      | 0.0005                                          |
| 139.90155                | 0.181178403              | 11.0422                                    | 20.929         | 0.0171                                      | 0.0005                                          |
| 155.34326                | 0.201182586              | 11.3812                                    | 22.121         | 0.0176                                      | 0.0004                                          |
| 192.50397                | 0.249320937              | 12.1709                                    | 25.082         | 0.0188                                      | 0.0004                                          |
| 233.73422                | 0.302734887              | 13.0319                                    | 28.699         | 0.0202                                      | 0.0004                                          |
| 273.52396                | 0.354288160              | 13.8606                                    | 32.583         | 0.0214                                      | 0.0003                                          |
| 309.97214                | 0.401518010              | 14.6371                                    | 36.649         | 0.0226                                      | 0.0003                                          |
| 348.42072                | 0.451351074              | 15.4841                                    | 41.615         | 0.0240                                      | 0.0003                                          |
| 387.14725                | 0.501542561              | 16.3864                                    | 47.512         | 0.0253                                      | 0.0002                                          |
| 425.75787                | 0.551588766              | 17.3727                                    | 54.639         | 0.0269                                      | 0.0002                                          |
| 464.37173                | 0.601666241              | 18.4818                                    | 63.461         | 0.0286                                      | 0.0002                                          |
| 501.75464                | 0.650136180              | 19.7362                                    | 74.293         | 0.0305                                      | 0.0002                                          |
| 540.44421                | 0.700304447              | 21.3176                                    | 89.132         | 0.0330                                      | 0.0002                                          |
| 571.13580                | 0.740113750              | 22.9294                                    | 104.863        | 0.0355                                      | 0.0002                                          |
| 595.07837                | 0.771191255              | 24.5080                                    | 121.102        | 0.0379                                      | 0.0002                                          |
| 617.39740                | 0.800168729              | 26.3823                                    | 141.023        | 0.0408                                      | 0.0001                                          |
| 633.28143                | 0.820809516              | 28.1048                                    | 158.353        | 0.0435                                      | 0.0002                                          |
| 648.57825                | 0.840703058              | 30.2250                                    | 180.999        | 0.0468                                      | 0.0001                                          |

**Full Report Set**

ASAP 2020 V3.00 H

Unit 1

Serial #: 531

Page 10

Sample: Satheesh / Iron Oxide Ag Tungstate  
 Operator: A Narayanan  
 Submitter: Chemistry,Thiagarajar College, Madurai  
 File: C:\2020\DATA\2013\EXT-188.SMP

|                                          |                                                   |
|------------------------------------------|---------------------------------------------------|
| Started: 7/26/2013 8:19:53AM             | Analysis Adsorptive: N2                           |
| Completed: 7/26/2013 9:42:09PM           | Analysis Bath Temp.: -195.667 °C                  |
| Report Time: 11/10/2014 4:09:03PM        | Thermal Correction: No                            |
| Sample Mass: 0.7873 g                    | Warm Free Space: 16.6299 cm <sup>3</sup> Measured |
| Cold Free Space: 50.9896 cm <sup>3</sup> | Equilibration Interval: 5 s                       |
| Low Pressure Dose: None                  | Automatic Degas: Yes                              |

Comments: Sample outgassed at 200 C 12 hrs.

| Absolute Pressure (mmHg) | Relative Pressure (P/Po) | Quantity Adsorbed (cm <sup>3</sup> /g STP) | Pore Width (Å) | Cumulative Pore Volume (cm <sup>3</sup> /g) | Differential Pore Volume (cm <sup>3</sup> /g.Å) |
|--------------------------|--------------------------|--------------------------------------------|----------------|---------------------------------------------|-------------------------------------------------|
| 663.34283                | 0.859909831              | 32.9202                                    | 206.815        | 0.0509                                      | 0.0002                                          |
| 675.21576                | 0.875382459              | 35.8790                                    | 234.143        | 0.0555                                      | 0.0002                                          |
| 686.57977                | 0.890198127              | 39.7601                                    | 267.399        | 0.0615                                      | 0.0002                                          |
| 695.86963                | 0.902339007              | 44.6204                                    | 302.602        | 0.0690                                      | 0.0002                                          |
| 703.18506                | 0.911921944              | 49.7197                                    | 333.203        | 0.0769                                      | 0.0003                                          |
| 709.25452                | 0.919890916              | 55.2291                                    | 373.595        | 0.0854                                      | 0.0002                                          |
| 717.02502                | 0.930154621              | 64.9364                                    | 430.144        | 0.1004                                      | 0.0003                                          |
| 720.96423                | 0.935376668              | 71.3871                                    | 469.163        | 0.1104                                      | 0.0003                                          |
| 727.44916                | 0.943978495              | 84.5494                                    | 544.773        | 0.1308                                      | 0.0003                                          |
| 730.77094                | 0.948344146              | 92.1763                                    | 588.627        | 0.1426                                      | 0.0003                                          |
| 735.88092                | 0.955035755              | 105.1804                                   | 683.352        | 0.1627                                      | 0.0002                                          |
| 738.73761                | 0.958773434              | 112.4762                                   | 745.159        | 0.1740                                      | 0.0002                                          |
| 742.88049                | 0.964211098              | 124.9199                                   | 864.929        | 0.1932                                      | 0.0002                                          |
| 744.81360                | 0.966750629              | 131.7502                                   | 934.395        | 0.2038                                      | 0.0002                                          |
| 747.09521                | 0.969742695              | 138.6004                                   | 1028.175       | 0.2144                                      | 0.0001                                          |
| 748.81177                | 0.971998057              | 143.8874                                   | 1121.016       | 0.2226                                      | 0.0001                                          |
| 751.14392                | 0.975079986              | 151.9592                                   | 1233.458       | 0.2351                                      | 0.0001                                          |
| 752.36267                | 0.976686036              | 155.8468                                   | 1357.144       | 0.2411                                      | 0.0000                                          |
| 753.70551                | 0.978453250              | 159.8046                                   | 1479.593       | 0.2472                                      | 0.0000                                          |
| 754.88617                | 0.980013452              | 163.8808                                   | 1598.232       | 0.2535                                      | 0.0001                                          |
| 757.54822                | 0.983413822              | 171.9880                                   | 1758.395       | 0.2660                                      | 0.0001                                          |
| 759.09473                | 0.985334673              | 175.3964                                   | 2110.754       | 0.2713                                      | 0.0000                                          |
| 760.29047                | 0.986799915              | 178.6600                                   | 2322.170       | 0.2764                                      | 0.0000                                          |

Sample: Satheesh / Iron Oxide Ag Tungstate  
Operator: A Narayanan  
Submitter: Chemistry, Thiagarajar College, Madurai  
File: C:\2020\DATA\2013\EXT-188.SMP

Started: 7/26/2013 8:19:53AM  
Completed: 7/26/2013 9:42:09PM  
Report Time: 11/10/2014 4:09:03PM  
Sample Mass: 0.7873 g  
Cold Free Space: 50.9896 cm<sup>3</sup>  
Low Pressure Dose: None

Analysis Adsorptive: N2  
Analysis Bath Temp.: -195.667 °C  
Thermal Correction: No  
Warm Free Space: 16.6299 cm<sup>3</sup> Measured  
Equilibration Interval: 5 s  
Automatic Degas: Yes

Comments: Sample outgassed at 200 C 12 hrs.

**Horvath-Kawazoe Differential Pore Volume Plot**

Slit Pore Geometry (Original H-K)

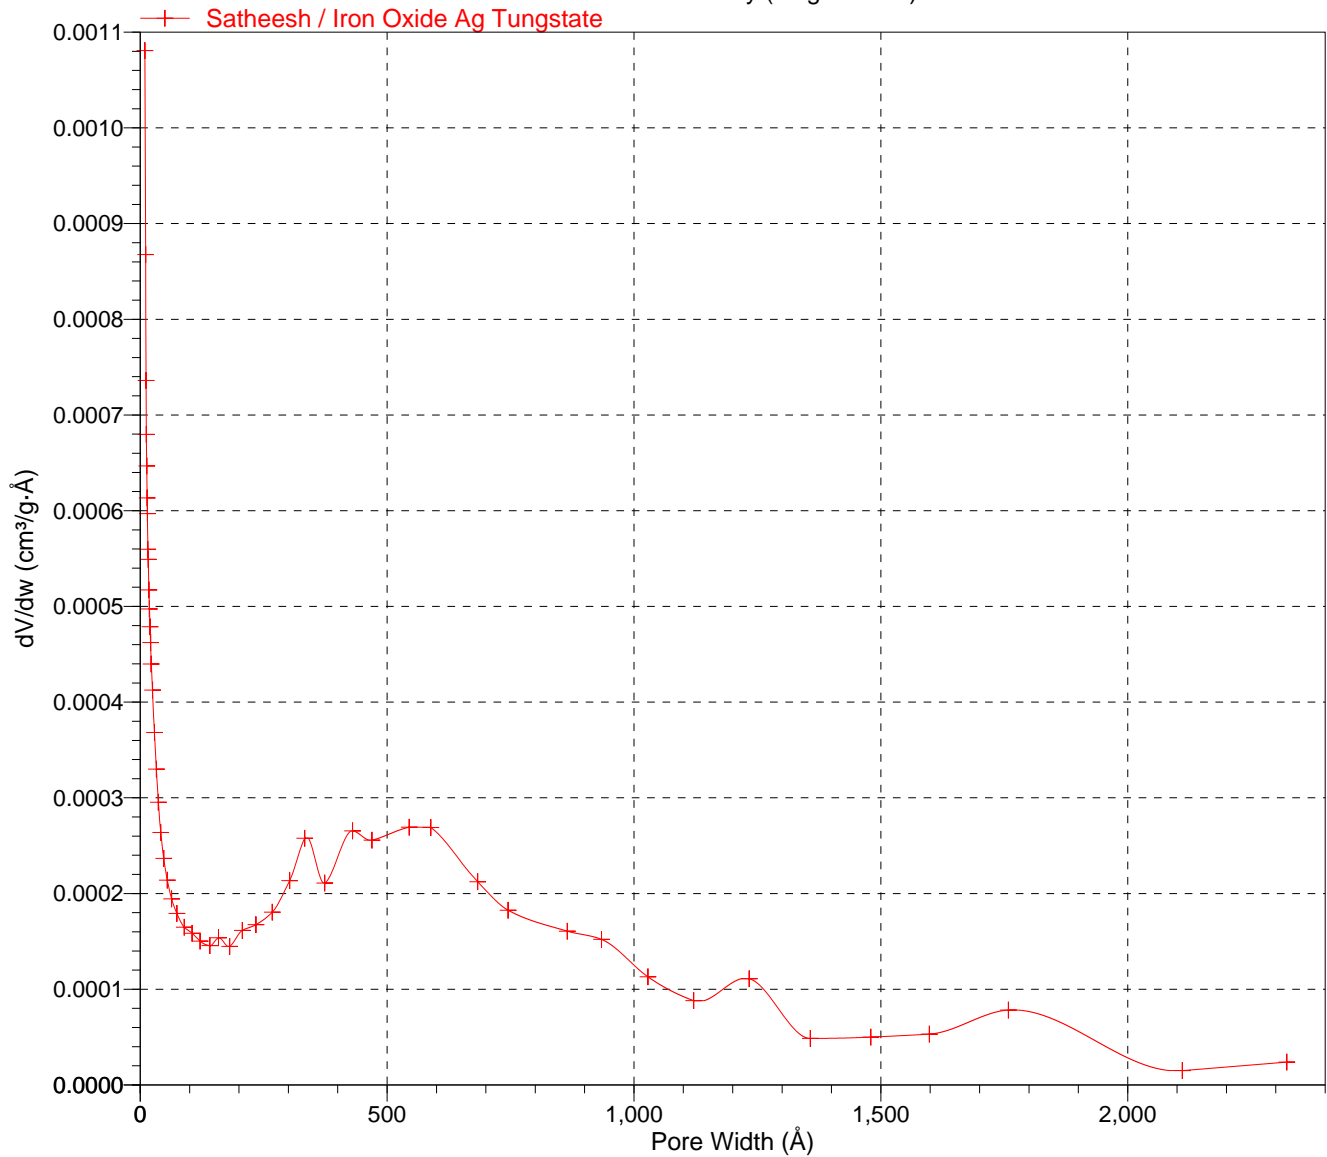

Supplement: c7nj03004e2.pdf [file c7nj03004e2.pdf]
