# Supplementary material for: Fe3O4–Ag2WO4: facile synthesis, characterization and visible light assisted photocatalytic activity
Source: Royal Society of Chemistry journal article supplement (doi:10.1039/c7nj03004e), 2017-01-01

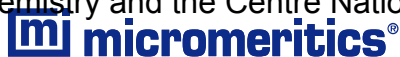

### Full Report Set

ASAP 2020 V3.00 H

Unit 1

Serial #: 531

Page 1

Sample: Satheesh / Bare Iron Oxide  
Operator: A Narayanan  
Submitter: Chemistry, Thiagarajar College, Madurai  
File: C:\2020\DATA\2013\EXT-185.SMP

|                                          |                                                   |
|------------------------------------------|---------------------------------------------------|
| Started: 7/24/2013 8:17:47AM             | Analysis Adsorptive: N2                           |
| Completed: 7/24/2013 7:50:43PM           | Analysis Bath Temp.: -195.665 °C                  |
| Report Time: 11/10/2014 4:09:00PM        | Thermal Correction: No                            |
| Sample Mass: 0.4924 g                    | Warm Free Space: 16.6573 cm <sup>3</sup> Measured |
| Cold Free Space: 51.4145 cm <sup>3</sup> | Equilibration Interval: 5 s                       |
| Low Pressure Dose: None                  | Automatic Degas: Yes                              |

Comments: Sample outgassed at 200 C 12 hrs.

### Summary Report

#### Surface Area

BET Surface Area: 65.8879 m<sup>2</sup>/g

#### Pore Volume

Single point adsorption total pore volume of pores  
less than 704.647 Å radius at P/Po = 0.986074778: 0.301539 cm<sup>3</sup>/g

#### Pore Size

BJH Desorption average pore radius (2V/A): 68.278 Å

**Full Report Set**

ASAP 2020 V3.00 H

Unit 1

Serial #: 531

Page 2

Sample: Satheesh / Bare Iron Oxide  
 Operator: A Narayanan  
 Submitter: Chemistry,Thiagarajar College, Madurai  
 File: C:\2020\DATA\2013\EXT-185.SMP

|                                          |                                                   |
|------------------------------------------|---------------------------------------------------|
| Started: 7/24/2013 8:17:47AM             | Analysis Adsorptive: N2                           |
| Completed: 7/24/2013 7:50:43PM           | Analysis Bath Temp.: -195.665 °C                  |
| Report Time: 11/10/2014 4:09:00PM        | Thermal Correction: No                            |
| Sample Mass: 0.4924 g                    | Warm Free Space: 16.6573 cm <sup>3</sup> Measured |
| Cold Free Space: 51.4145 cm <sup>3</sup> | Equilibration Interval: 5 s                       |
| Low Pressure Dose: None                  | Automatic Degas: Yes                              |

Comments: Sample outgassed at 200 C 12 hrs.

**Isotherm Tabular Report**

| Relative Pressure (P/Po) | Absolute Pressure (mmHg) | Quantity Adsorbed (cm <sup>3</sup> /g STP) | Saturation Pressure (mmHg) |
|--------------------------|--------------------------|--------------------------------------------|----------------------------|
|                          |                          |                                            | 773.45380                  |
| 0.010983800              | 8.49053                  | 10.3349                                    |                            |
| 0.022138487              | 17.11210                 | 11.6625                                    |                            |
| 0.031848655              | 24.61662                 | 12.4080                                    |                            |
| 0.039658829              | 30.65235                 | 12.8882                                    |                            |
| 0.050347207              | 38.91220                 | 13.4450                                    |                            |
| 0.059292924              | 45.82471                 | 13.8567                                    |                            |
| 0.070726555              | 54.65953                 | 14.3334                                    |                            |
| 0.080519660              | 62.22663                 | 14.7053                                    |                            |
| 0.100577978              | 77.72554                 | 15.4134                                    |                            |
| 0.120707966              | 93.27887                 | 16.0697                                    |                            |
| 0.140615570              | 108.65939                | 16.6860                                    |                            |
| 0.160710398              | 124.18362                | 17.2863                                    |                            |
| 0.180821456              | 139.72087                | 17.8741                                    |                            |
| 0.201103872              | 155.38828                | 18.4590                                    |                            |
| 0.249123989              | 192.48631                | 19.8217                                    |                            |
| 0.302291771              | 233.55685                | 21.3498                                    |                            |
| 0.352442931              | 272.29620                | 22.8440                                    |                            |
| 0.400885750              | 309.71011                | 24.3543                                    |                            |
| 0.451108758              | 348.49979                | 26.0195                                    |                            |
| 0.501149362              | 387.14212                | 27.8413                                    |                            |
| 0.551351353              | 425.90591                | 29.8817                                    |                            |
|                          |                          |                                            | 772.46039                  |
| 0.600873119              | 464.12753                | 32.2389                                    |                            |
| 0.650262348              | 502.25180                | 35.0777                                    |                            |
| 0.699650695              | 540.37158                | 38.7175                                    |                            |
| 0.740414712              | 571.82123                | 42.6163                                    |                            |
| 0.771083695              | 595.47119                | 46.3345                                    |                            |
| 0.800513921              | 618.16174                | 50.6768                                    |                            |
| 0.820752449              | 633.74579                | 54.3962                                    |                            |
| 0.841269755              | 649.54938                | 58.7561                                    |                            |
| 0.860221747              | 664.13593                | 63.5916                                    |                            |
| 0.875695557              | 676.03528                | 68.4014                                    |                            |
| 0.891041306              | 687.83411                | 73.8900                                    |                            |
| 0.905089350              | 698.62262                | 80.0930                                    |                            |
| 0.916132168              | 707.08990                | 85.9520                                    |                            |
| 0.925286536              | 714.10553                | 91.7930                                    |                            |
| 0.933661166              | 720.51843                | 97.5083                                    |                            |
| 0.939997080              | 725.35724                | 102.8881                                   |                            |
| 0.946601639              | 730.40265                | 109.1677                                   |                            |
| 0.951902328              | 734.44135                | 115.4214                                   |                            |
| 0.957170282              | 738.44684                | 122.2164                                   |                            |

**Full Report Set**

ASAP 2020 V3.00 H

Unit 1

Serial #: 531

Page 3

Sample: Satheesh / Bare Iron Oxide  
 Operator: A Narayanan  
 Submitter: Chemistry,Thiagarajar College, Madurai  
 File: C:\2020\DATA\2013\EXT-185.SMP

|                                          |                                                   |
|------------------------------------------|---------------------------------------------------|
| Started: 7/24/2013 8:17:47AM             | Analysis Adsorptive: N2                           |
| Completed: 7/24/2013 7:50:43PM           | Analysis Bath Temp.: -195.665 °C                  |
| Report Time: 11/10/2014 4:09:00PM        | Thermal Correction: No                            |
| Sample Mass: 0.4924 g                    | Warm Free Space: 16.6573 cm <sup>3</sup> Measured |
| Cold Free Space: 51.4145 cm <sup>3</sup> | Equilibration Interval: 5 s                       |
| Low Pressure Dose: None                  | Automatic Degas: Yes                              |

Comments: Sample outgassed at 200 C 12 hrs.

**Isotherm Tabular Report**

| Relative Pressure (P/Po) | Absolute Pressure (mmHg) | Quantity Adsorbed (cm <sup>3</sup> /g STP) | Saturation Pressure (mmHg) |
|--------------------------|--------------------------|--------------------------------------------|----------------------------|
|                          |                          |                                            | 771.48181                  |
| 0.961872015              | 742.03333                | 129.2275                                   |                            |
| 0.965910041              | 745.11487                | 135.7078                                   |                            |
| 0.968931925              | 747.41711                | 141.8499                                   |                            |
| 0.971784954              | 749.58411                | 148.2050                                   |                            |
| 0.974691154              | 751.79675                | 154.5704                                   |                            |
| 0.976715788              | 753.32928                | 160.1301                                   |                            |
| 0.978642291              | 754.78601                | 165.7607                                   |                            |
| 0.980309362              | 756.04254                | 171.4097                                   |                            |
| 0.981869798              | 757.21674                | 177.2180                                   |                            |
| 0.983400120              | 758.36761                | 183.2819                                   |                            |
| 0.984733796              | 759.36676                | 189.1627                                   |                            |
| 0.986074778              | 760.37146                | 194.9440                                   |                            |
| 0.969060919              | 747.19897                | 178.2765                                   |                            |
| 0.957515462              | 738.22546                | 160.4371                                   |                            |
| 0.951140389              | 733.25372                | 151.1759                                   |                            |
| 0.932789939              | 719.05139                | 129.5414                                   |                            |
|                          |                          |                                            | 770.85107                  |
| 0.915120046              | 705.48199                | 114.0993                                   |                            |
| 0.905493481              | 698.11078                | 107.1827                                   |                            |
| 0.874764377              | 674.48236                | 89.0527                                    |                            |
| 0.858997776              | 662.37311                | 82.4922                                    |                            |
| 0.812051902              | 626.24500                | 66.8559                                    |                            |
| 0.767934556              | 592.26892                | 56.6304                                    |                            |
| 0.729962771              | 563.01550                | 50.1100                                    |                            |
| 0.684043354              | 527.62842                | 44.0222                                    |                            |
| 0.637665398              | 491.88004                | 39.3076                                    |                            |
| 0.594005404              | 458.21817                | 35.7888                                    |                            |
| 0.549367698              | 423.79965                | 32.9197                                    |                            |
| 0.505079049              | 389.64795                | 30.5721                                    |                            |
| 0.464383825              | 358.26865                | 27.8579                                    |                            |
| 0.411569734              | 317.53207                | 25.2096                                    |                            |
|                          |                          |                                            | 771.52570                  |
| 0.372332589              | 287.26416                | 23.8573                                    |                            |
| 0.330483921              | 254.97684                | 22.5569                                    |                            |
| 0.284013625              | 219.12381                | 21.1620                                    |                            |
| 0.239335579              | 184.65355                | 19.8624                                    |                            |
| 0.195305679              | 150.68335                | 18.5875                                    |                            |
| 0.151216772              | 116.66763                | 17.2847                                    |                            |

Sample: Satheesh / Bare Iron Oxide  
Operator: A Narayanan  
Submitter: Chemistry, Thiagarajar College, Madurai  
File: C:\2020\DATA\2013\EXT-185.SMP

Started: 7/24/2013 8:17:47AM  
Completed: 7/24/2013 7:50:43PM  
Report Time: 11/10/2014 4:09:00PM  
Sample Mass: 0.4924 g  
Cold Free Space: 51.4145 cm<sup>3</sup>  
Low Pressure Dose: None

Analysis Adsorptive: N2  
Analysis Bath Temp.: -195.665 °C  
Thermal Correction: No  
Warm Free Space: 16.6573 cm<sup>3</sup> Measured  
Equilibration Interval: 5 s  
Automatic Degas: Yes

Comments: Sample outgassed at 200 C 12 hrs.

**Isotherm Linear Plot**

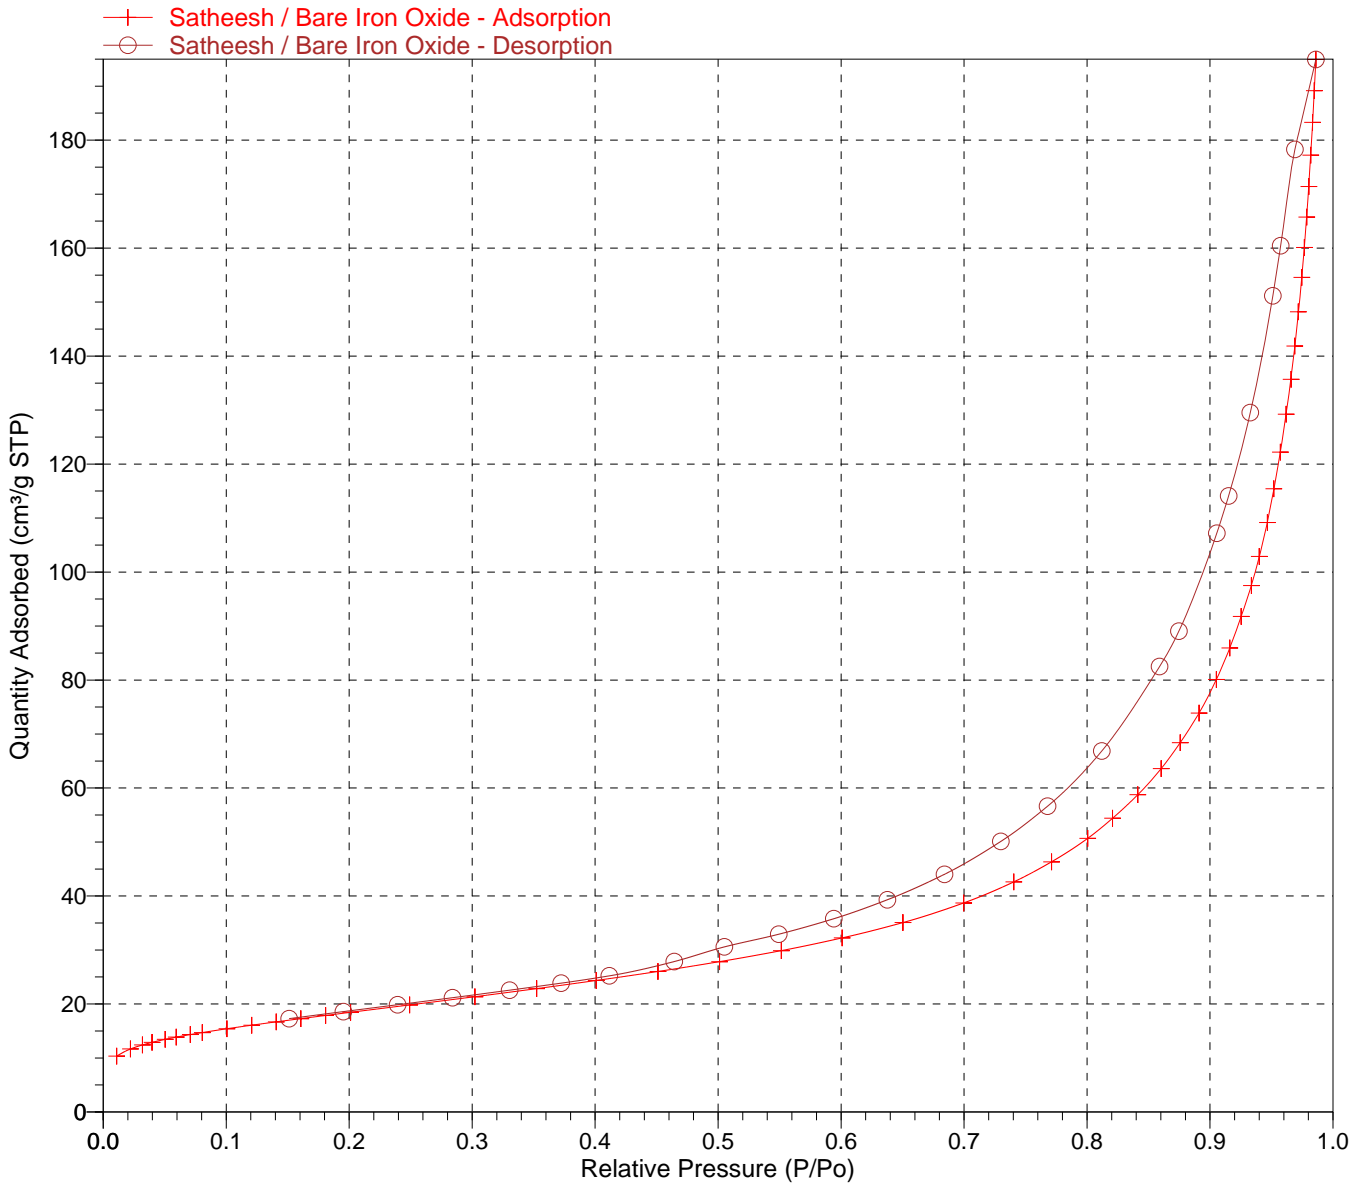

**Full Report Set**

ASAP 2020 V3.00 H

Unit 1

Serial #: 531

Page 5

Sample: Satheesh / Bare Iron Oxide  
 Operator: A Narayanan  
 Submitter: Chemistry, Thiagarajar College, Madurai  
 File: C:\2020\DATA\2013\EXT-185.SMP

|                                          |                                                   |
|------------------------------------------|---------------------------------------------------|
| Started: 7/24/2013 8:17:47AM             | Analysis Adsorptive: N2                           |
| Completed: 7/24/2013 7:50:43PM           | Analysis Bath Temp.: -195.665 °C                  |
| Report Time: 11/10/2014 4:09:00PM        | Thermal Correction: No                            |
| Sample Mass: 0.4924 g                    | Warm Free Space: 16.6573 cm <sup>3</sup> Measured |
| Cold Free Space: 51.4145 cm <sup>3</sup> | Equilibration Interval: 5 s                       |
| Low Pressure Dose: None                  | Automatic Degas: Yes                              |

Comments: Sample outgassed at 200 C 12 hrs.

**BET Surface Area Report**

BET Surface Area: 65.8879 ± 0.2729 m<sup>2</sup>/g  
 Slope: 0.065495 ± 0.000270 g/cm<sup>3</sup> STP  
 Y-Intercept: 0.000575 ± 0.000044 g/cm<sup>3</sup> STP  
 C: 114.931081  
 Qm: 15.1355 cm<sup>3</sup>/g STP  
 Correlation Coefficient: 0.9998724  
 Molecular Cross-Sectional Area: 0.1620 nm<sup>2</sup>

| Relative Pressure (P/Po) | Quantity Adsorbed (cm <sup>3</sup> /g STP) | 1/[Q(Po/P - 1)] |
|--------------------------|--------------------------------------------|-----------------|
| 0.010983800              | 10.3349                                    | 0.001075        |
| 0.022138487              | 11.6625                                    | 0.001941        |
| 0.031848655              | 12.4080                                    | 0.002651        |
| 0.039658829              | 12.8882                                    | 0.003204        |
| 0.050347207              | 13.4450                                    | 0.003943        |
| 0.059292924              | 13.8567                                    | 0.004549        |
| 0.070726555              | 14.3334                                    | 0.005310        |
| 0.080519660              | 14.7053                                    | 0.005955        |
| 0.100577978              | 15.4134                                    | 0.007255        |
| 0.120707966              | 16.0697                                    | 0.008543        |
| 0.140615570              | 16.6860                                    | 0.009806        |
| 0.160710398              | 17.2863                                    | 0.011077        |
| 0.180821456              | 17.8741                                    | 0.012349        |
| 0.201103872              | 18.4590                                    | 0.013637        |
| 0.249123989              | 19.8217                                    | 0.016738        |
| 0.302291771              | 21.3498                                    | 0.020294        |
| 0.352442931              | 22.8440                                    | 0.023825        |

Sample: Satheesh / Bare Iron Oxide  
Operator: A Narayanan  
Submitter: Chemistry, Thiagarajar College, Madurai  
File: C:\2020\DATA\2013\EXT-185.SMP

Started: 7/24/2013 8:17:47AM  
Completed: 7/24/2013 7:50:43PM  
Report Time: 11/10/2014 4:09:00PM  
Sample Mass: 0.4924 g  
Cold Free Space: 51.4145 cm<sup>3</sup>  
Low Pressure Dose: None

Analysis Adsorptive: N2  
Analysis Bath Temp.: -195.665 °C  
Thermal Correction: No  
Warm Free Space: 16.6573 cm<sup>3</sup> Measured  
Equilibration Interval: 5 s  
Automatic Degas: Yes

Comments: Sample outgassed at 200 C 12 hrs.

**BET Surface Area Plot**

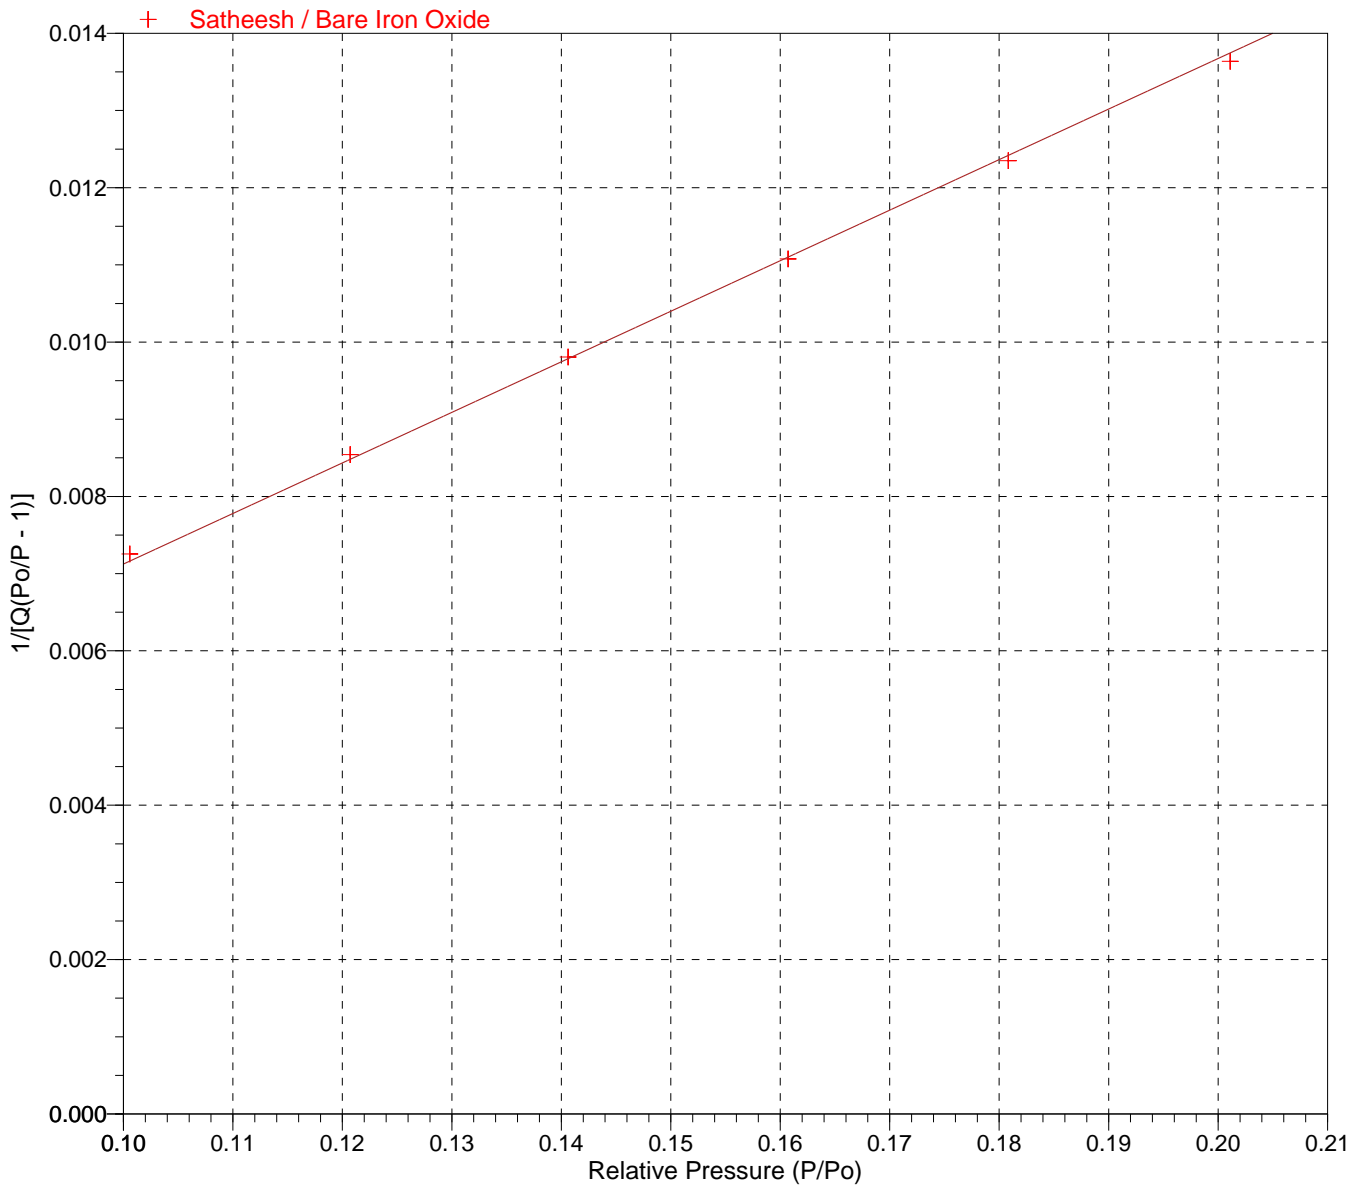

**Full Report Set**

ASAP 2020 V3.00 H

Unit 1

Serial #: 531

Page 7

Sample: Satheesh / Bare Iron Oxide  
 Operator: A Narayanan  
 Submitter: Chemistry,Thiagarajar College, Madurai  
 File: C:\2020\DATA\2013\EXT-185.SMP

Started: 7/24/2013 8:17:47AM  
 Completed: 7/24/2013 7:50:43PM  
 Report Time: 11/10/2014 4:09:00PM  
 Sample Mass: 0.4924 g  
 Cold Free Space: 51.4145 cm<sup>3</sup>  
 Low Pressure Dose: None

Analysis Adsorptive: N2  
 Analysis Bath Temp.: -195.665 °C  
 Thermal Correction: No  
 Warm Free Space: 16.6573 cm<sup>3</sup> Measured  
 Equilibration Interval: 5 s  
 Automatic Degas: Yes

Comments: Sample outgassed at 200 C 12 hrs.

**BJH Desorption Pore Distribution Report**

Faas Correction

$$t = 3.54 \left[ -5 / \ln(P/P_0) \right]^{0.333}$$

Radius Range: 8.500 Å to 1500.000 Å

Adsorbate Property Factor: 9.53000 Å

Density Conversion Factor: 0.0015468

Fraction of Pores Open at Both Ends: 0.00

| Pore Radius Range (Å) | Average Radius (Å) | Incremental Pore Volume (cm <sup>3</sup> /g) | Cumulative Pore Volume (cm <sup>3</sup> /g) | Incremental Pore Area (m <sup>2</sup> /g) | Cumulative Pore Area (m <sup>2</sup> /g) |
|-----------------------|--------------------|----------------------------------------------|---------------------------------------------|-------------------------------------------|------------------------------------------|
| 703.1 - 320.8         | 384.5              | 0.028313                                     | 0.028313                                    | 1.473                                     | 1.473                                    |
| 320.8 - 235.2         | 264.7              | 0.030858                                     | 0.059171                                    | 2.332                                     | 3.804                                    |
| 235.2 - 205.1         | 218.0              | 0.016162                                     | 0.075332                                    | 1.483                                     | 5.287                                    |
| 205.1 - 150.1         | 168.9              | 0.038346                                     | 0.113678                                    | 4.540                                     | 9.827                                    |
| 150.1 - 119.4         | 131.1              | 0.027660                                     | 0.141338                                    | 4.218                                     | 14.045                                   |
| 119.4 - 107.5         | 112.8              | 0.012453                                     | 0.153791                                    | 2.208                                     | 16.253                                   |
| 107.5 - 81.5          | 90.8               | 0.033267                                     | 0.187059                                    | 7.332                                     | 23.585                                   |
| 81.5 - 72.5           | 76.4               | 0.011935                                     | 0.198993                                    | 3.124                                     | 26.709                                   |
| 72.5 - 54.4           | 60.7               | 0.029101                                     | 0.228094                                    | 9.584                                     | 36.293                                   |
| 54.4 - 44.0           | 48.0               | 0.018946                                     | 0.247040                                    | 7.896                                     | 44.189                                   |
| 44.0 - 37.6           | 40.2               | 0.011873                                     | 0.258913                                    | 5.901                                     | 50.090                                   |
| 37.6 - 31.9           | 34.2               | 0.010868                                     | 0.269780                                    | 6.350                                     | 56.440                                   |
| 31.9 - 27.5           | 29.3               | 0.008080                                     | 0.277860                                    | 5.507                                     | 61.947                                   |
| 27.5 - 24.3           | 25.7               | 0.005705                                     | 0.283565                                    | 4.447                                     | 66.394                                   |
| 24.3 - 21.5           | 22.7               | 0.004260                                     | 0.287825                                    | 3.752                                     | 70.147                                   |
| 21.5 - 19.3           | 20.3               | 0.003147                                     | 0.290972                                    | 3.108                                     | 73.255                                   |
| 19.3 - 17.5           | 18.3               | 0.004779                                     | 0.295752                                    | 5.232                                     | 78.486                                   |
| 17.5 - 15.5           | 16.3               | 0.003800                                     | 0.299551                                    | 4.653                                     | 83.139                                   |
| 15.5 - 14.2           | 14.8               | 0.000992                                     | 0.300544                                    | 1.346                                     | 84.485                                   |
| 14.2 - 12.9           | 13.5               | 0.000693                                     | 0.301236                                    | 1.029                                     | 85.514                                   |
| 12.9 - 11.6           | 12.2               | 0.000673                                     | 0.301910                                    | 1.106                                     | 86.620                                   |
| 11.6 - 10.5           | 11.0               | 0.000495                                     | 0.302405                                    | 0.902                                     | 87.522                                   |
| 10.5 - 9.4            | 9.9                | 0.000365                                     | 0.302770                                    | 0.740                                     | 88.262                                   |
| 9.4 - 8.4             | 8.8                | 0.000216                                     | 0.302986                                    | 0.489                                     | 88.750                                   |

Sample: Satheesh / Bare Iron Oxide  
Operator: A Narayanan  
Submitter: Chemistry, Thiagarajar College, Madurai  
File: C:\2020\DATA\2013\EXT-185.SMP

Started: 7/24/2013 8:17:47AM  
Completed: 7/24/2013 7:50:43PM  
Report Time: 11/10/2014 4:09:00PM  
Sample Mass: 0.4924 g  
Cold Free Space: 51.4145 cm<sup>3</sup>  
Low Pressure Dose: None

Analysis Adsorptive: N2  
Analysis Bath Temp.: -195.665 °C  
Thermal Correction: No  
Warm Free Space: 16.6573 cm<sup>3</sup> Measured  
Equilibration Interval: 5 s  
Automatic Degas: Yes

Comments: Sample outgassed at 200 C 12 hrs.

**BJH Desorption dV/dlog(r) Pore Volume**

Faas Correction

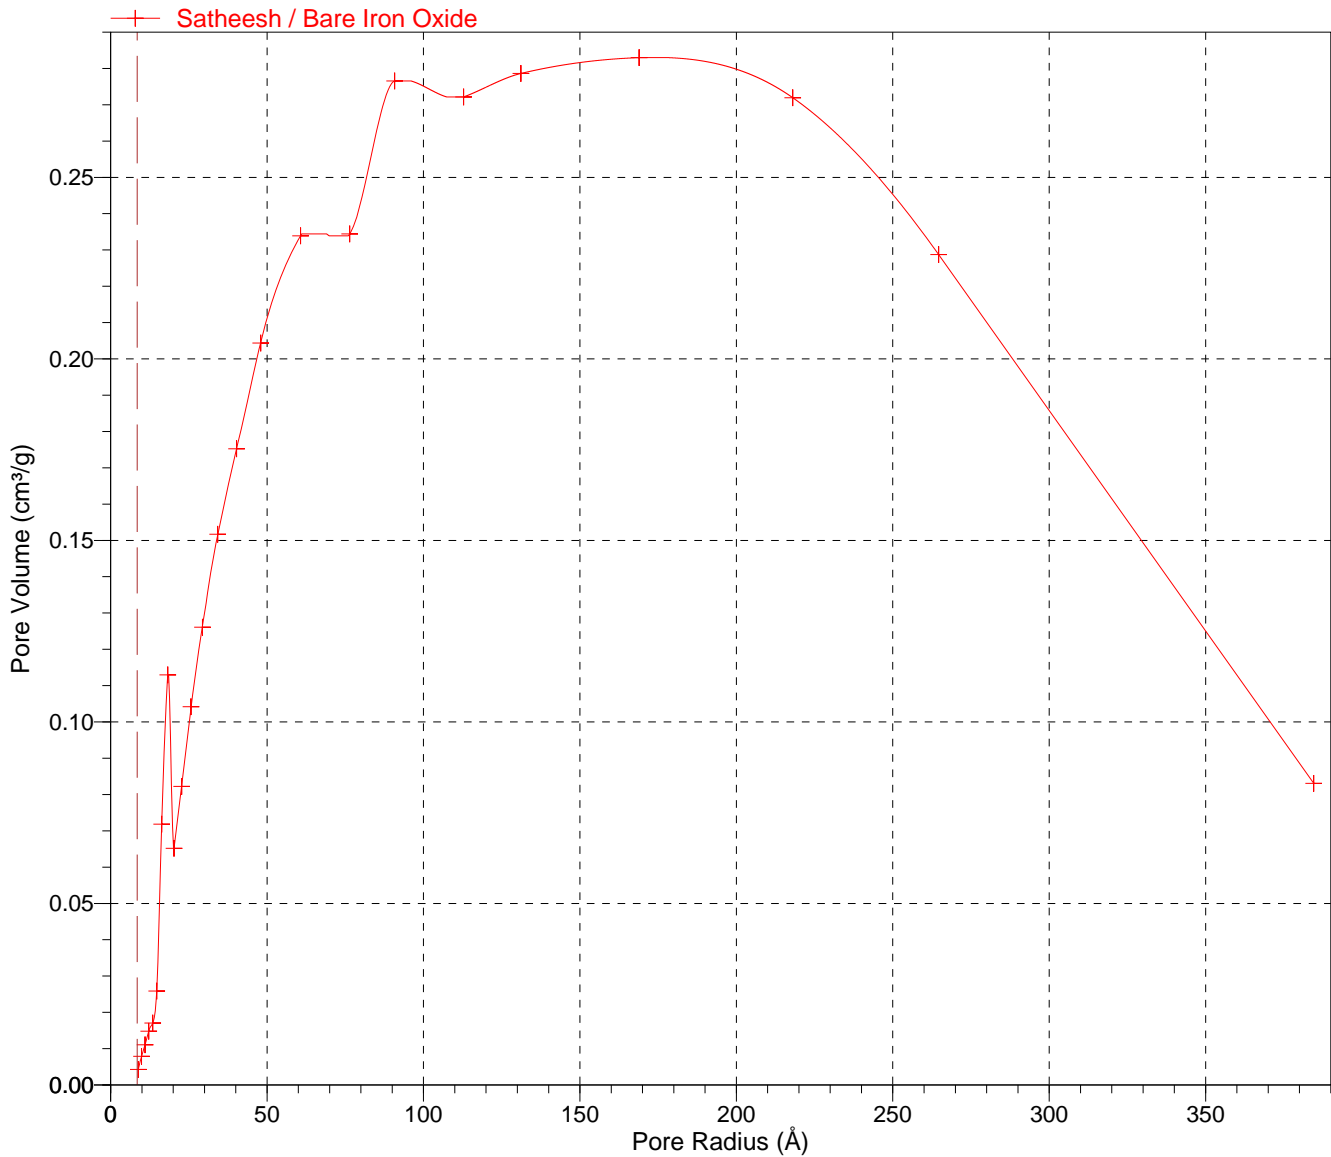



**Full Report Set**

ASAP 2020 V3.00 H

Unit 1

Serial #: 531

Page 9

Sample: Satheesh / Bare Iron Oxide  
 Operator: A Narayanan  
 Submitter: Chemistry,Thiagarajar College, Madurai  
 File: C:\2020\DATA\2013\EXT-185.SMP

Started: 7/24/2013 8:17:47AM  
 Completed: 7/24/2013 7:50:43PM  
 Report Time: 11/10/2014 4:09:00PM  
 Sample Mass: 0.4924 g  
 Cold Free Space: 51.4145 cm<sup>3</sup>  
 Low Pressure Dose: None

Analysis Adsorptive: N2  
 Analysis Bath Temp.: -195.665 °C  
 Thermal Correction: No  
 Warm Free Space: 16.6573 cm<sup>3</sup> Measured  
 Equilibration Interval: 5 s  
 Automatic Degas: Yes

Comments: Sample outgassed at 200 C 12 hrs.

**Horvath-Kawazoe Report**

Slit Pore Geometry (Original H-K)

Maximum Pore Volume: 0.301539 cm<sup>3</sup>/g  
 at Relative Pressure: 0.986074778  
 Median Pore Width: 454.287 Å  
 Relative Pressure Range: 1.098e-02 to 9.861e-01

Diameter of Adsorptive Molecule: 3.000 Å  
 Diameter of Adsorptive at Zero Interaction Energy: 2.574 Å  
 Diameter of Sample Atom: 3.400 Å  
 Diameter of Sample Atom at Zero Interaction Energy: 2.917 Å  
 Interaction Parameter: 3.73e-43 erg-cm<sup>4</sup>

Density Conversion Factor: 0.0015468

| Absolute Pressure (mmHg) | Relative Pressure (P/Po) | Quantity Adsorbed (cm <sup>3</sup> /g STP) | Pore Width (Å) | Cumulative Pore Volume (cm <sup>3</sup> /g) | Differential Pore Volume (cm <sup>3</sup> /g.Å) |
|--------------------------|--------------------------|--------------------------------------------|----------------|---------------------------------------------|-------------------------------------------------|
| 8.49053                  | 0.010983800              | 10.3349                                    | 9.540          | 0.0160                                      | 0.0017                                          |
| 17.11210                 | 0.022138487              | 11.6625                                    | 10.847         | 0.0180                                      | 0.0016                                          |
| 24.61662                 | 0.031848655              | 12.4080                                    | 11.727         | 0.0192                                      | 0.0013                                          |
| 30.65235                 | 0.039658829              | 12.8882                                    | 12.347         | 0.0199                                      | 0.0012                                          |
| 38.91220                 | 0.050347207              | 13.4450                                    | 13.129         | 0.0208                                      | 0.0011                                          |
| 45.82471                 | 0.059292924              | 13.8567                                    | 13.737         | 0.0214                                      | 0.0010                                          |
| 54.65953                 | 0.070726555              | 14.3334                                    | 14.474         | 0.0222                                      | 0.0010                                          |
| 62.22663                 | 0.080519660              | 14.7053                                    | 15.081         | 0.0227                                      | 0.0009                                          |
| 77.72554                 | 0.100577978              | 15.4134                                    | 16.283         | 0.0238                                      | 0.0009                                          |
| 93.27887                 | 0.120707966              | 16.0697                                    | 17.444         | 0.0249                                      | 0.0009                                          |
| 108.65939                | 0.140615570              | 16.6860                                    | 18.590         | 0.0258                                      | 0.0008                                          |
| 124.18362                | 0.160710398              | 17.2863                                    | 19.751         | 0.0267                                      | 0.0008                                          |
| 139.72087                | 0.180821456              | 17.8741                                    | 20.909         | 0.0276                                      | 0.0008                                          |
| 155.38828                | 0.201103872              | 18.4590                                    | 22.100         | 0.0286                                      | 0.0008                                          |
| 192.48631                | 0.249123989              | 19.8217                                    | 25.084         | 0.0307                                      | 0.0007                                          |
| 233.55685                | 0.302291771              | 21.3498                                    | 28.673         | 0.0330                                      | 0.0007                                          |
| 272.29620                | 0.352442931              | 22.8440                                    | 32.457         | 0.0353                                      | 0.0006                                          |
| 309.71011                | 0.400885750              | 24.3543                                    | 36.617         | 0.0377                                      | 0.0006                                          |
| 348.49979                | 0.451108758              | 26.0195                                    | 41.579         | 0.0402                                      | 0.0005                                          |
| 387.14212                | 0.501149362              | 27.8413                                    | 47.471         | 0.0431                                      | 0.0005                                          |
| 425.90591                | 0.551351353              | 29.8817                                    | 54.593         | 0.0462                                      | 0.0004                                          |
| 464.12753                | 0.600873119              | 32.2389                                    | 63.292         | 0.0499                                      | 0.0004                                          |
| 502.25180                | 0.650262348              | 35.0777                                    | 74.296         | 0.0543                                      | 0.0004                                          |
| 540.37158                | 0.699650695              | 38.7175                                    | 89.058         | 0.0599                                      | 0.0004                                          |
| 571.82123                | 0.740414712              | 42.6163                                    | 105.053        | 0.0659                                      | 0.0004                                          |
| 595.47119                | 0.771083695              | 46.3345                                    | 121.321        | 0.0717                                      | 0.0004                                          |
| 618.16174                | 0.800513921              | 50.6768                                    | 141.276        | 0.0784                                      | 0.0003                                          |
| 633.74579                | 0.820752449              | 54.3962                                    | 158.638        | 0.0841                                      | 0.0003                                          |
| 649.54938                | 0.841269755              | 58.7561                                    | 181.323        | 0.0909                                      | 0.0003                                          |

Full Report Set

ASAP 2020 V3.00 H

Unit 1

Serial #: 531

Page 10

Sample: Satheesh / Bare Iron Oxide  
 Operator: A Narayanan  
 Submitter: Chemistry,Thiagarajar College, Madurai  
 File: C:\2020\DATA\2013\EXT-185.SMP

Started: 7/24/2013 8:17:47AM  
 Completed: 7/24/2013 7:50:43PM  
 Report Time: 11/10/2014 4:09:00PM  
 Sample Mass: 0.4924 g  
 Cold Free Space: 51.4145 cm<sup>3</sup>  
 Low Pressure Dose: None

Analysis Adsorptive: N2  
 Analysis Bath Temp.: -195.665 °C  
 Thermal Correction: No  
 Warm Free Space: 16.6573 cm<sup>3</sup> Measured  
 Equilibration Interval: 5 s  
 Automatic Degas: Yes

Comments: Sample outgassed at 200 C 12 hrs.

| Absolute Pressure (mmHg) | Relative Pressure (P/Po) | Quantity Adsorbed (cm <sup>3</sup> /g STP) | Pore Width (Å) | Cumulative Pore Volume (cm <sup>3</sup> /g) | Differential Pore Volume (cm <sup>3</sup> /g.Å) |
|--------------------------|--------------------------|--------------------------------------------|----------------|---------------------------------------------|-------------------------------------------------|
| 664.13593                | 0.860221747              | 63.5916                                    | 207.184        | 0.0984                                      | 0.0003                                          |
| 676.03528                | 0.875695557              | 68.4014                                    | 234.560        | 0.1058                                      | 0.0003                                          |
| 687.83411                | 0.891041306              | 73.8900                                    | 270.254        | 0.1143                                      | 0.0002                                          |
| 698.62262                | 0.905089350              | 80.0930                                    | 314.039        | 0.1239                                      | 0.0002                                          |
| 707.08990                | 0.916132168              | 85.9520                                    | 355.306        | 0.1330                                      | 0.0002                                          |
| 714.10553                | 0.925286536              | 91.7930                                    | 401.938        | 0.1420                                      | 0.0002                                          |
| 720.51843                | 0.933661166              | 97.5083                                    | 454.631        | 0.1508                                      | 0.0002                                          |
| 725.35724                | 0.939997080              | 102.8881                                   | 500.435        | 0.1591                                      | 0.0002                                          |
| 730.40265                | 0.946601639              | 109.1677                                   | 570.971        | 0.1689                                      | 0.0001                                          |
| 734.44135                | 0.951902328              | 115.4214                                   | 628.409        | 0.1785                                      | 0.0002                                          |
| 738.44684                | 0.957170282              | 122.2164                                   | 691.589        | 0.1890                                      | 0.0002                                          |
| 742.03333                | 0.961872015              | 129.2275                                   | 809.738        | 0.1999                                      | 0.0001                                          |
| 745.11487                | 0.965910041              | 135.7078                                   | 891.051        | 0.2099                                      | 0.0001                                          |
| 747.41711                | 0.968931925              | 141.8499                                   | 980.496        | 0.2194                                      | 0.0001                                          |
| 749.58411                | 0.971784954              | 148.2050                                   | 1078.886       | 0.2292                                      | 0.0001                                          |
| 751.79675                | 0.974691154              | 154.5704                                   | 1187.115       | 0.2391                                      | 0.0001                                          |
| 753.32928                | 0.976715788              | 160.1301                                   | 1306.166       | 0.2477                                      | 0.0001                                          |
| 754.78601                | 0.978642291              | 165.7607                                   | 1437.123       | 0.2564                                      | 0.0001                                          |
| 756.04254                | 0.980309362              | 171.4097                                   | 1581.175       | 0.2651                                      | 0.0001                                          |
| 757.21674                | 0.981869798              | 177.2180                                   | 1739.633       | 0.2741                                      | 0.0001                                          |
| 758.36761                | 0.983400120              | 183.2819                                   | 1913.936       | 0.2835                                      | 0.0001                                          |
| 759.36676                | 0.984733796              | 189.1627                                   | 2105.669       | 0.2926                                      | 0.0000                                          |
| 760.37146                | 0.986074778              | 194.9440                                   | 2316.576       | 0.3015                                      | 0.0000                                          |

Sample: Satheesh / Bare Iron Oxide  
Operator: A Narayanan  
Submitter: Chemistry, Thiagarajar College, Madurai  
File: C:\2020\DATA\2013\EXT-185.SMP

Started: 7/24/2013 8:17:47AM  
Completed: 7/24/2013 7:50:43PM  
Report Time: 11/10/2014 4:09:00PM  
Sample Mass: 0.4924 g  
Cold Free Space: 51.4145 cm<sup>3</sup>  
Low Pressure Dose: None

Analysis Adsorptive: N<sub>2</sub>  
Analysis Bath Temp.: -195.665 °C  
Thermal Correction: No  
Warm Free Space: 16.6573 cm<sup>3</sup> Measured  
Equilibration Interval: 5 s  
Automatic Degas: Yes

Comments: Sample outgassed at 200 C 12 hrs.

**Horvath-Kawazoe Differential Pore Volume Plot**

Slit Pore Geometry (Original H-K)

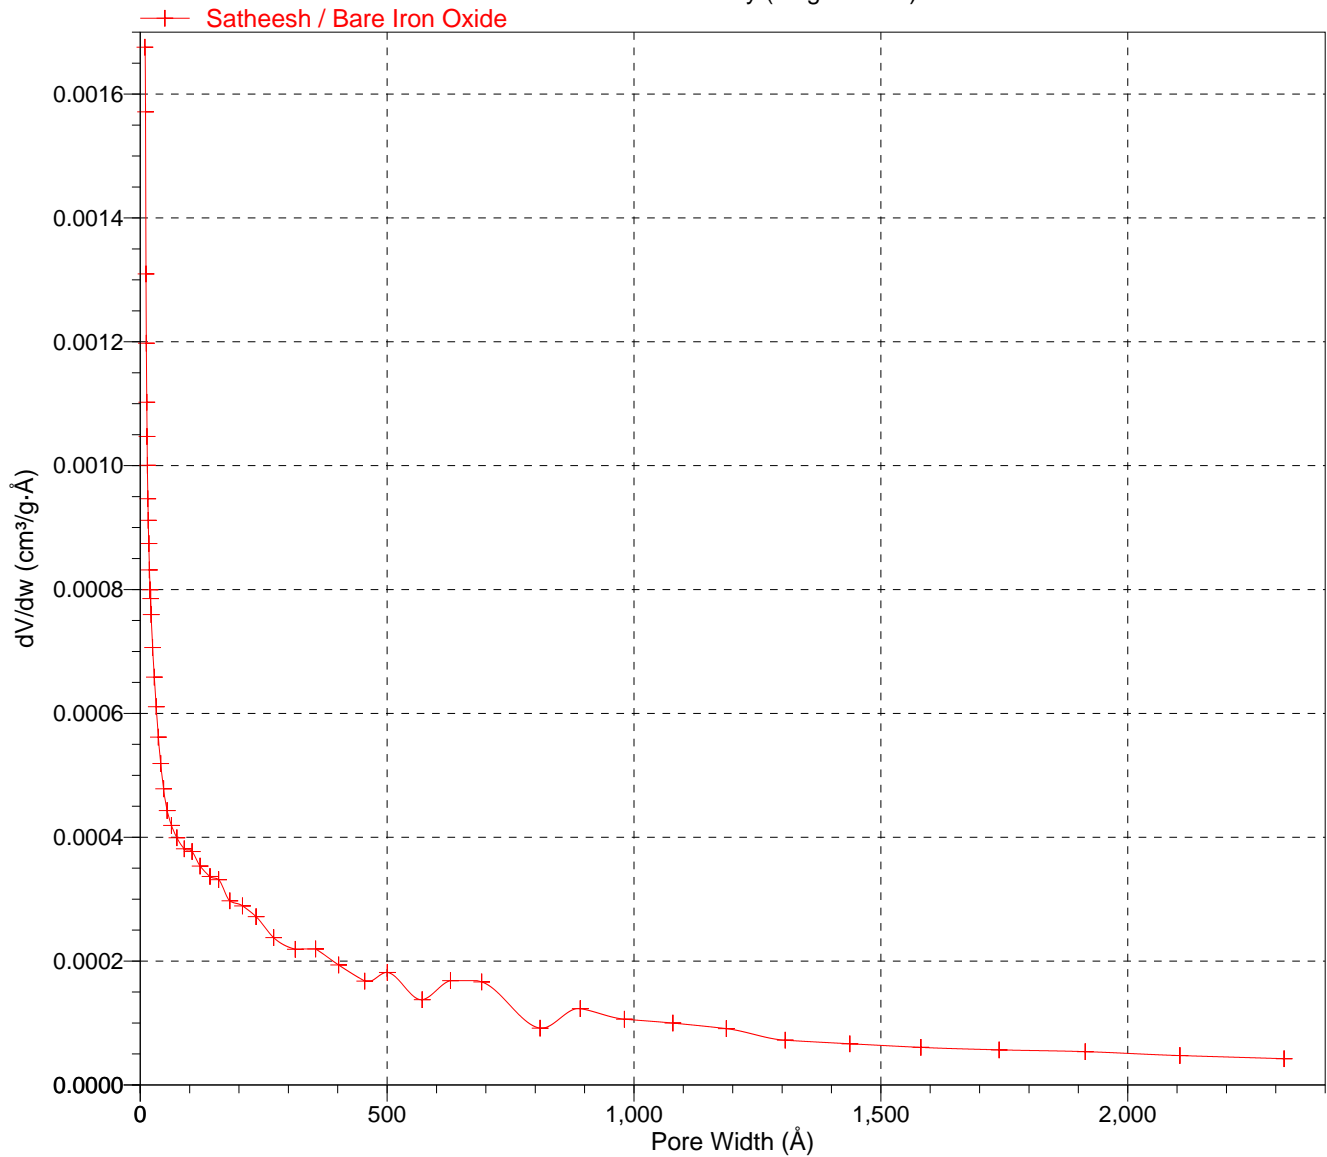

Supplement: c7nj03004e3.pdf [file c7nj03004e3.pdf]
